# Supplementary material for: Cross-sectional associations between central and general adiposity with albuminuria: observations from 400,000 people in UK Biobank
Source: PubMed Central journal article supplement (PMC7577847; doi:10.1038/s41366-020-0642-3), 2020-07-16
Supplement: 41366_2020_642_MOESM1_ESM.pdf [file 41366_2020_642_MOESM1_ESM.pdf]

**Table S1: Literature review search terms and study selection flow sheet**

| Search criteria                                                                               | Search terms (MeSH terms, or key word searches)                                                                                                                                                                                                                                                                                                                                                                                                                                                                                                                                                                                                                                           |
|-----------------------------------------------------------------------------------------------|-------------------------------------------------------------------------------------------------------------------------------------------------------------------------------------------------------------------------------------------------------------------------------------------------------------------------------------------------------------------------------------------------------------------------------------------------------------------------------------------------------------------------------------------------------------------------------------------------------------------------------------------------------------------------------------------|
| Adiposity                                                                                     | Adiposity OR obesity OR overweight OR anthropometry OR body distribution OR body composition OR body mass index OR body mass OR BMI OR height adjusted weight OR height-adjusted weight OR HtaW OR hip circumference OR waist circumference OR abdominal girth OR bio-impedance OR bioimpedance OR bioelectrical impedance OR body fat OR body fat percentage OR waist hip ratio OR waist:hip ratio OR waist-hip ratio OR waist-to-hip ratio OR waist height ratio OR waist:height ratio OR waist-height ratio OR waist-to-height ratio OR impedance OR trunk fat OR trunk fat percentage OR trunk body fat OR body fat distribution OR fat distribution OR subcutaneous fat distribution |
| Chronic kidney disease                                                                        | Glomerular filtration rate OR GFR OR eGFR OR albuminuria OR microalbuminuria OR albumin OR urine albumin OR albumin to creatinine ratio OR albumin-to-creatinine ratio OR ACR OR uACR OR proteinuria OR protein to creatinine ratio OR protein creatinine ratio OR uPCR OR protein-to-creatinine ratio OR PCR OR albumin excretion rate OR AER OR uAER OR kidney disease OR chronic kidney disease OR CKD OR chronic renal disease OR renal progression OR renal function OR kidney function OR end stage renal disease OR end-stage renal disease OR ESRD OR kidney failure OR renal failure                                                                                             |
| Study design                                                                                  | Cross-sectional OR cross sectional OR observational OR case-control OR case control OR prospective OR longitudinal OR cohort OR genetic OR Mendelian randomisation OR Mendelian randomization                                                                                                                                                                                                                                                                                                                                                                                                                                                                                             |
| Databases and date range: Medline (from 1946 to 22/05/2018); Embase (from 1974 to 22/05/2018) |                                                                                                                                                                                                                                                                                                                                                                                                                                                                                                                                                                                                                                                                                           |

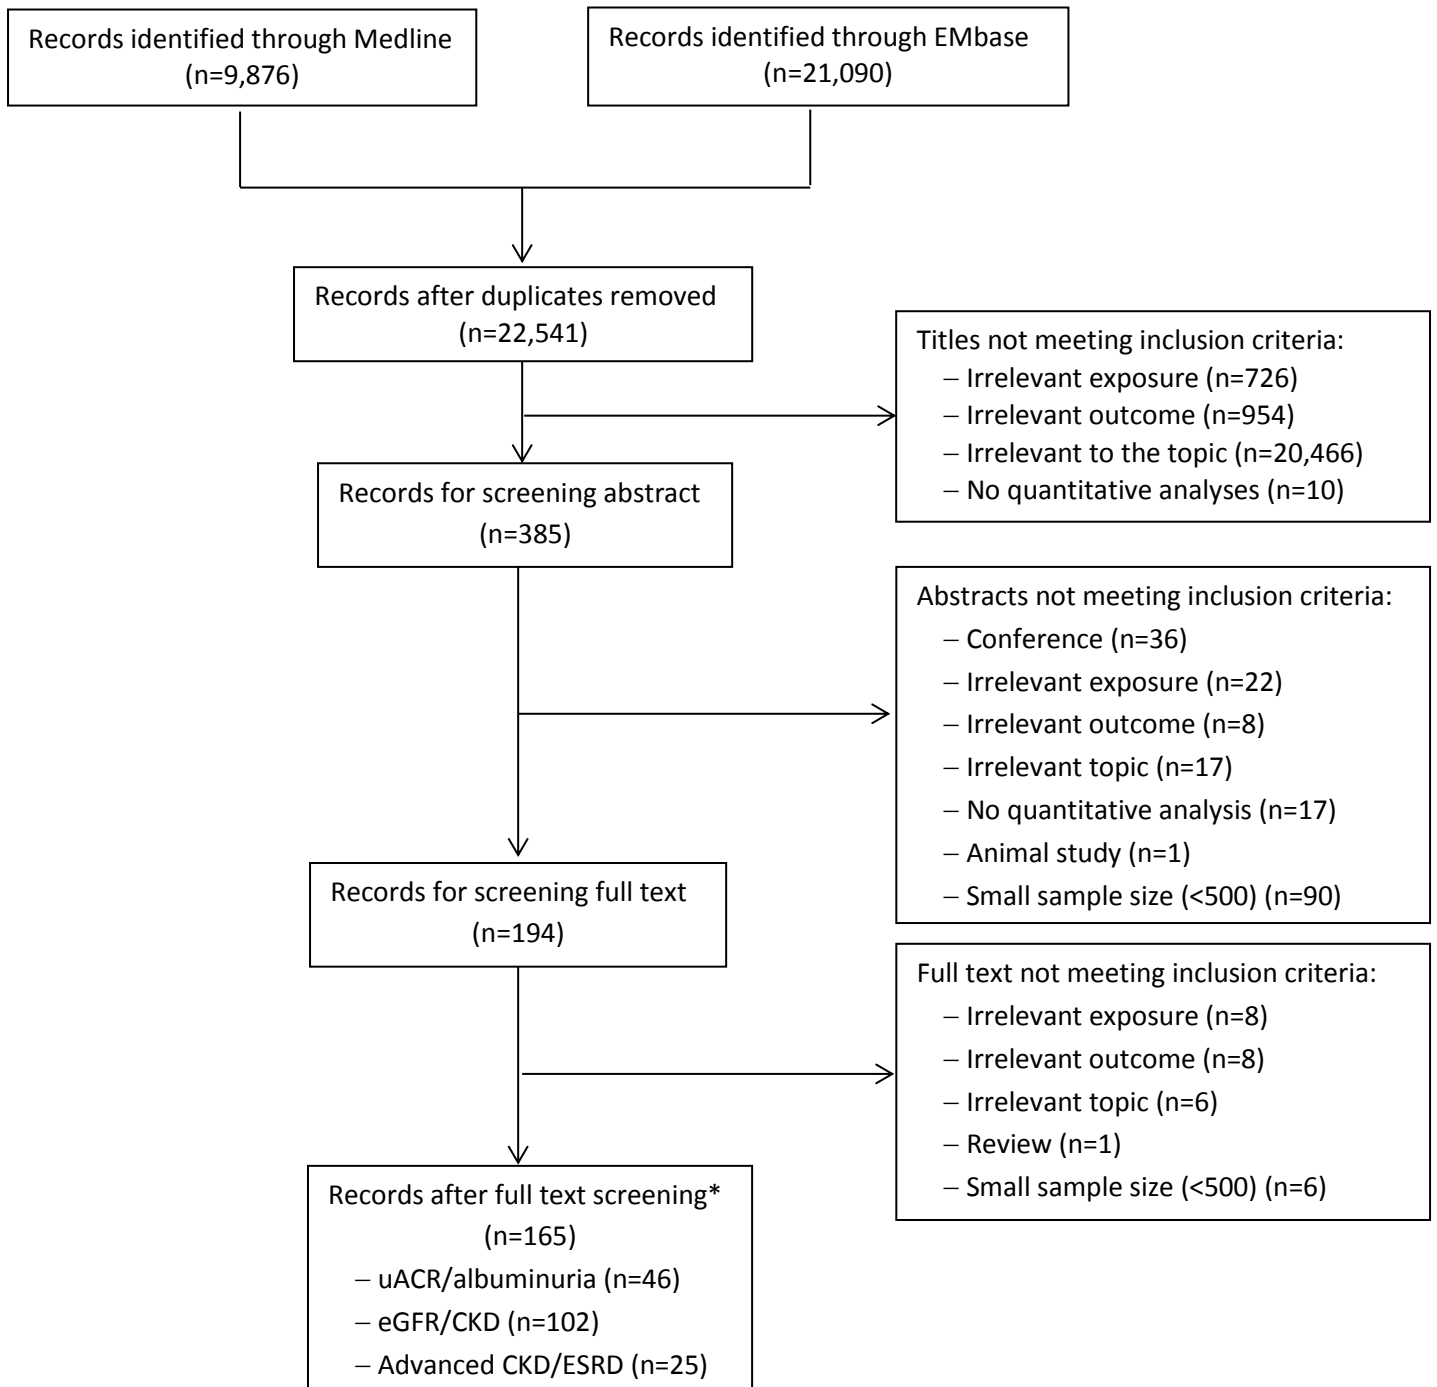

uACR: urinary albumin-to-creatinine ratio; eGFR: estimated glomerular filtration rate; CKD: chronic kidney disease; ESRD: end-stage renal disease.

\* All studies included have been reviewed but this study summarises literatures on uACR or albuminuria outcomes.

**Table S2: Literature review results (limited to studies using albuminuria as an outcome)**

| Study Baseline Characteristics |                              |                  |                                 |                                                               |                                         |                                                                          |                                                                | Study Results                                   |                                                 |                                                                              |
|--------------------------------|------------------------------|------------------|---------------------------------|---------------------------------------------------------------|-----------------------------------------|--------------------------------------------------------------------------|----------------------------------------------------------------|-------------------------------------------------|-------------------------------------------------|------------------------------------------------------------------------------|
| Study                          | Recruitment year (follow-up) | Study location   | Sample size                     | Demographics                                                  | Co-morbidity prevalence                 | Adiposity measures                                                       | Outcome                                                        | Adjustments                                     | Exposure                                        | Reported association (ORs/HRs with 95% CI or $\beta$ [p-value] shown)*       |
| <b>General adiposity</b>       |                              |                  |                                 |                                                               |                                         |                                                                          |                                                                |                                                 |                                                 |                                                                              |
| <b>Cohort studies</b>          |                              |                  |                                 |                                                               |                                         |                                                                          |                                                                |                                                 |                                                 |                                                                              |
| Jang et al. 2014(1)            | 2002-2009                    | Korea            | 53,876                          | Age: 35<br>Male: 63%<br>Ethnicity: Korean                     | DM: 1.5%<br>HTN: 11.3%<br>SBP: N/A      | BMI: 23.2 Kg/m <sup>2</sup><br>WC: 78.9 cm                               | Proteinuria                                                    | Demographics, lifestyle, DM, HTN, lipids, eGFR  | BMI: cut-offs (18.5, 23, 25 Kg/m <sup>2</sup> ) | Obese vs normal weight:<br>Men: 1.38 (1.09-1.75)<br>Women: non-significant   |
| Cederholm et al. 2004(2)       | 1997 (4.6 years)             | Sweden           | 10,610                          | Age: 53<br>Male: 53%<br>Ethnicity: N/A                        | DM: 100%<br>HTN: N/A<br>SBP: 139 mmHg   | BMI: 26.8 Kg/m <sup>2</sup>                                              | Microalbuminuria: urine albumin 20-200 $\mu$ g/min             | Demographics, lifestyle, BP, lipids, HbA1c      | BMI: per 1-Kg/m <sup>2</sup>                    | T1DM: 5.93 (2.22-15.7)<br>T2DM: 2.03 (1.04-3.97)                             |
| Lin et al. 2012(3)             | 2004.10 (2009.7)             | Taiwan           | 2,350                           | Age: 57<br>Male: 49%<br>Ethnicity: Chinese                    | DM: 12.1%<br>HTN: N/A<br>SBP: 136 mmHg  | BMI: 24.3 Kg/m <sup>2</sup><br>WC: 81.4 cm                               | Albuminuria                                                    | Demographics, lifestyle, BP, lipids, eGFR, BMI  | BMI                                             | Non-significant                                                              |
| Rossi et al. 2010(4)           | N/A                          | Italy            | 1,019                           | Age: 63<br>Male: 64%<br>Ethnicity: N/A                        | DM: 100%<br>HTN: 62%<br>SBP: N/A        | BMI: 29.2 Kg/m <sup>2</sup><br>WC: 101.3 cm                              | Progression of UAE: doubling in ACR from baseline to follow up | Multivariable analysis with stepwise selection  | BMI                                             | Overall: 2.19 (1.16-4.15)                                                    |
| Tozawa et al. 2002(5)          | 1997 (1999)                  | Japan            | 5,403                           | Age: 48<br>Men: 63%<br>Ethnicity: Japanese                    | DM: 5.1%<br>HTN: 21%<br>SBP: N/A        | Obesity: 33.8%                                                           | Proteinuria                                                    | Demographics, lifestyle, lipids                 | Obesity: BMI $\geq$ 25 Kg/m <sup>2</sup>        | Overall: 1.45 (1.13-1.86)<br>Men: 1.60 (1.19-2.14)<br>Women: non-significant |
| Todd et al. 2015(6)            | 1998 (2004)                  | Finland          | 2,897                           | Age: 41<br>Male: 51%<br>Ethnicity: N/A                        | T1DM: 100%<br>HTN: N/A<br>SBP: N/A      | BMI: 25.3 Kg/m <sup>2</sup>                                              | Macroalbuminuria                                               | Demographics, diabetes duration                 | BMI: quintiles                                  | U-shaped<br>Q5 vs Q2: 1.58 (1.06-2.36)                                       |
| Chang et al. 2013(7)           | 1995-1996 (15 years)         | USA              | 2,354                           | Age: 35<br>Male: 47%<br>African American: 41%                 | DM: 1.8%<br>HTN: 6%<br>SBP: 109 mmHg    | BMI: 27 Kg/m <sup>2</sup><br>WC: 85.1 cm                                 | Microalbuminuria: sex- and race-defined uACR $\geq$ 25 mg/g    | Demographics, ACR                               | Obesity: BMI $\geq$ 30 Kg/m <sup>2</sup>        | Overall: 2.2 (1.3-3.8)<br>Significant with adjustments of HTN, DM            |
| Bello et al. 2007(8)           | 1991 (4.2 years)             | Netherlands      | 6,894                           | Age: 49<br>Male: 50%<br>Caucasian: 96%                        | DM: N/A<br>HTN: N/A<br>SBP: 128 mmHg    | BMI: stable weight (median-25.4 Kg/m <sup>2</sup> )                      | Change in UAE: continuous                                      | Demographics, medication                        | Weight change: per 1 Kg                         | $\beta$ (p-value): 0.77 (0.004)                                              |
| Amini et al. 2007(9)           | 1999 (5 years)               | Iran             | 505                             | Age: 57.3<br>Male: 47%<br>Ethnicity: N/A                      | T2DM: 100%<br>HTN: N/A<br>SBP: 130 mmHg | BMI: 29.2 Kg/m <sup>2</sup>                                              | Microalbuminuria: urine albumin excretion of 30-300 mg/24h     | Univariate analysis                             | BMI                                             | Non-significant                                                              |
| <b>Cross-sectional studies</b> |                              |                  |                                 |                                                               |                                         |                                                                          |                                                                |                                                 |                                                 |                                                                              |
| Cederholm et al. 2004(2)       | 2002                         | Sweden           | 40,172                          | Age: 61<br>Male: 54%<br>Ethnicity: N/A                        | DM: 100%<br>HTN: 73%<br>SBP: 140 mmHg   | BMI: 28 Kg/m <sup>2</sup>                                                | Microalbuminuria: urine albumin 20-200 $\mu$ g/min             | Demographics, lifestyle, BP, DM duration, HbA1c | BMI: per 1-Kg/m <sup>2</sup>                    | T1DM: 3.18 (1.46-6.91)<br>T2DM: 8.07 (4.64-14.0)                             |
| Todd et al. 2015(6)            | N/A                          | USA, UK, Finland | Cases: 2,347;<br>control: 2,900 | Age: cases (45), controls (41)<br>Male: 49%<br>Ethnicity: N/A | T1DM: 45%<br>HTN: N/A<br>SBP: N/A       | BMI: cases (25.7 Kg/m <sup>2</sup> ), controls (25.7 Kg/m <sup>2</sup> ) | Macroalbuminuria                                               | Demographics, DM duration                       | BMI                                             | Overall: 1.28 (1.16-1.40)                                                    |
| Zheng et al. 2011(10)          | 2007.9-2008.11               | China            | 2,080                           | Age: 51<br>Male: 39%                                          | DM: 2%<br>HTN: 41.3%                    | BMI: 26.6 Kg/m <sup>2</sup>                                              | Microalbuminuria                                               | Demographics, SBP, TC, HDL                      | BMI                                             | Overall: 1.34 (1.06-1.69)                                                    |

|                         |                |              |         |                                                       |                                                  |                                                                  |                                                      |                                                      |                                                         |                                                                                                             |
|-------------------------|----------------|--------------|---------|-------------------------------------------------------|--------------------------------------------------|------------------------------------------------------------------|------------------------------------------------------|------------------------------------------------------|---------------------------------------------------------|-------------------------------------------------------------------------------------------------------------|
|                         |                |              |         | Ethnicity: Chinese                                    | SBP: 130.8 mmHg                                  |                                                                  |                                                      |                                                      |                                                         |                                                                                                             |
| Zheng et al. 2010(11)   | 2007.9-2008.11 | China        | 2,080   | Age: 51<br>Male: 39%<br>Ethnicity: Chinese            | DM: 2%<br>HTN: 41.3%<br>SBP: 130.8 mmHg          | BMI: 26.6 Kg/m <sup>2</sup>                                      | Microalbuminuria                                     | Multivariable analysis with stepwise selection       | BMI                                                     | Men: not included<br>Women: 1.40 (1.13-1.74)                                                                |
| Liu et al. 2015(12)     | 2012.6-2013.2  | China        | 944     | Age: 61<br>Male: 44%<br>Ethnicity: Chinese            | DM: 15.3%<br>HTN: 100%<br>SBP: 147 mmHg          | BMI: 24.5 Kg/m <sup>2</sup><br>WC: 87.1 cm                       | Microalbuminuria                                     | Age, SBP, glucose                                    | BMI                                                     | Overall: 1.61 (1.22-2.10)                                                                                   |
| Tseng et al. 2005(13)   | N/A            | N/A          | 569     | Age: 64<br>Male: 50%<br>Ethnicity: N/A                | DM: 100%<br>HTN: N/A<br>SBP: 136 mmHg            | BMI: 25 Kg/m <sup>2</sup><br>WC: 89 cm<br>WHR: 0.56<br>WHR: 0.95 | Microalbuminuria                                     | N/A                                                  | BMI                                                     | Men: non-significant<br>Women: 1.40 (0.99-2.00)                                                             |
| Kaze et al. 2015(14)    | 2013.3-2013.4  | Cameroon     | 500     | Age: 45<br>Male: 53%<br>Ethnicity: N/A                | DM: 2.8%<br>HTN: 12.2%<br>SBP: 132 mmHg          | BMI: 27.1 Kg/m <sup>2</sup>                                      | Proteinuria                                          | Age, sex                                             | BMI                                                     | per 5-Kg/m <sup>2</sup> : non-significant<br>per 1-SD:<br>Men: non-significant<br>Women: 1.42 (1.20-1.68)   |
| Sato et al. 2013(15)    | 2008           | Japan        | 212,251 | Age: 65<br>Male: 40%<br>Ethnicity: Japanese           | DM: N/A<br>HTN: N/A<br>SBP: N/A                  | BMI (median):<br>23.6 Kg/m <sup>2</sup> (men),<br>22.4 (women)   | Proteinuria                                          | Demographics, lifestyle, lipids, BP, eGFR, WC        | BMI: cut-offs (11 categories)                           | Male: U-shaped<br>Female: U-shaped                                                                          |
| Ramirez et al. 2002(16) | 1999.1-2000.12 | Singapore    | 189,117 | Age: 36<br>Male: 53%<br>Chinese: 77.1%                | DM: 2.1%<br>HTN: 6.6%<br>SBP: N/A                | BMI ≥30 Kg/m <sup>2</sup> :<br>5.7%                              | Proteinuria                                          | Demographics, prior disease, BP, family history      | BMI: cut-offs (18, 23, 25, 27.5, 30 Kg/m <sup>2</sup> ) | U-shaped<br>≥30 vs (18, 23): 2.5 (2.2-3.0)                                                                  |
| Kim et al. 2013(17)     | 2008.11-2009.7 | Korea        | 40,153  | Age: 59<br>Male: 49%<br>Ethnicity: Korean             | DM: 17.6%<br>HTN: 10%<br>SBP: 130 mmHg           | BMI: 24.6 Kg/m <sup>2</sup>                                      | Albuminuria: uACR ≥30 mg/g in dipstick urinalysis    | Demographics, lifestyle, DM, BP, medication          | BMI: cut-offs (18.5, 23, 25 Kg/m <sup>2</sup> )         | Obesity vs normal weight: 1.47 (1.32-1.63)                                                                  |
| Thoenes et al. 2009(18) | 2005-2006      | 26 countries | 20,868  | Age: 62.4<br>Male: 52.3%<br>Ethnicity: N/A            | DM: 27.5%<br>HTN: N/A<br>SBP: 149 mmHg           | BMI: 28.9 Kg/m <sup>2</sup><br>WHR: 0.95<br>WC: 99.4 cm          | Microalbuminuria: 30-150 mg/L in dipstick urinalysis | Multivariable analysis with stepwise selection       | BMI: cut-offs (25, 28, 30, 35 Kg/m <sup>2</sup> )       | Non-significant                                                                                             |
| Kim et al. 2017(19)     | 2011-2014      | Korea        | 19,331  | Age: 46<br>Male: 45%<br>Ethnicity: Korean             | DM: 10.2%<br>HTN: 29%<br>SBP: 117 mmHg           | BMI: 23.7 Kg/m <sup>2</sup><br>WC: 80.7 cm                       | Albuminuria                                          | Age, lifestyle, BP, DM duration, HbA1c               | BMI: cut-offs (18.5, 23, 25 Kg/m <sup>2</sup> )         | ≥25 vs (18.5, 23):<br>Men: 1.58 (1.21-2.07)<br>Women: 1.40 (1.08-1.81)                                      |
| Lin et al. 2014(20)     | 2009.9-2012.6  | China        | 10,384  | Age: 53<br>Male: 43%<br>Ethnicity: Chinese            | DM: N/A<br>HTN: N/A<br>SBP: 133 mmHg             | BMI: 23.1 Kg/m <sup>2</sup>                                      | Microalbuminuria, macroalbuminuria, albuminuria      | Demographics, HTN, DM, hyperuricemia                 | Obesity:<br>BMI ≥30 Kg/m <sup>2</sup>                   | Microalbuminuria: 1.36 (1.10-1.69)<br>Macroalbuminuria: 1.59 (1.01-2.51)<br>Albuminuria: 1.39 (1.14-1.70)   |
| Ren et al. 2016(21)     | 2011.6-2011.11 | China        | 8,600   | Age: 56<br>Male: 29%<br>Ethnicity: Chinese            | DM: N/A<br>HTN: N/A<br>SBP: 126 mmHg             | BMI: 23.6 Kg/m <sup>2</sup><br>WC: 81.7 cm                       | Albuminuria                                          | Demographics, lifestyle, lipids, SBP, HbA1c, HOMA-IR | BMI: quartiles<br>Body fat content: quartiles           | Q4 vs Q1: 1.65 (1.26-2.18)<br>Non-significant                                                               |
| Kang et al. 2014(22)    | 2011           | Korea        | 6,045   | Age: 73<br>Male: 38%<br>Ethnicity: Korean             | DM: 46.8%<br>HTN: 90.7%<br>SBP: 127 mmHg         | BMI: 24.6 Kg/m <sup>2</sup>                                      | Albuminuria                                          | Demographics, lifestyle, HTN, DM                     | BMI: quartiles                                          | Non-significant                                                                                             |
| Noh et al. 2017(23)     | 2010-2012      | Korea        | 3,841   | Age: approximate 43<br>Male: 45%<br>Ethnicity: Korean | DM: N/A<br>HTN: N/A<br>SBP: approximate 120 mmHg | BMI: 23.4 Kg/m <sup>2</sup><br>WC: 80.1 cm<br>WHR: 0.49          | Albuminuria                                          | Demographics, lifestyle                              | BMI: sex-specific quartiles                             | Male: non-significant<br>Female:<br>Q4 vs Q2: 2.40 (1.24-4.68)<br>Significant with adjustments of mediators |
| Dittmann                | 1997.10-       | Germany      | 3,749   | Age: median (men)                                     | DM: 8.5%                                         | BMI (median):                                                    | Microalbuminuria:                                    | Demographics,                                        | BMI:                                                    | Non-significant                                                                                             |

|                                  |                         |                            |                                   |                                                                                            |                                                                                    |                                                                                                      |                                                                                           |                                                                         |                                                           |                                                                                                            |
|----------------------------------|-------------------------|----------------------------|-----------------------------------|--------------------------------------------------------------------------------------------|------------------------------------------------------------------------------------|------------------------------------------------------------------------------------------------------|-------------------------------------------------------------------------------------------|-------------------------------------------------------------------------|-----------------------------------------------------------|------------------------------------------------------------------------------------------------------------|
| et al.<br>2013(24)               | 2001.3                  |                            |                                   | [52], women [49])<br>Male: 51.3<br>Ethnicity: Caucasian                                    | HTN: 52.6%<br>SBP: N/A                                                             | men (27.4 Kg/m <sup>2</sup> ),<br>women (26.2<br>Kg/m <sup>2</sup> )<br>women (0.50)                 | uACR ≥2.5 mg/mmol<br>(men) or ≥3.5<br>mg/mmol (women)                                     | T2DM, HTN                                                               | sex-specific<br>quartiles                                 |                                                                                                            |
| Seo et al.<br>2016(25)           | 2013                    | Korea                      | 3,257                             | Age: 50<br>Male: 44<br>Ethnicity: Korean                                                   | DM: 0<br>HTN: 0<br>SBP: 115 mmHg                                                   | BMI: 23.7 Kg/m <sup>2</sup><br>WC: 80.4 cm                                                           | Microalbuminuria                                                                          | Demographics,<br>BP, lipids, HbA1c,<br>WC                               | BMI: cut-offs<br>(18.5, 23, 25, 30<br>Kg/m <sup>2</sup> ) | Significant in underweight group vs<br>normal weight                                                       |
| Du et al.<br>2014(26)            | 2010.1-<br>2010.5       | China                      | 2,889                             | Age: 54<br>Male: 39%<br>Ethnicity: Chinese                                                 | DM: 100%<br>HTN: 50.3%<br>SBP: 131 mmHg                                            | BMI: 24.8 Kg/m <sup>2</sup><br>WHR: 0.89                                                             | Albuminuria: uACR<br>≥17 mg/g (men) or<br>≥25 mg/g (women)                                | Demographics,<br>lifestyle, HTN,<br>blood glucose,<br>lipids, uric acid | BMI: cut-offs (24,<br>28 Kg/m <sup>2</sup> )              | [24,28] vs <24: non-significant<br>≥28 vs <24: 1.61 (1.22-2.13)                                            |
| Konta et al.<br>2006(27)         | 2004                    | Japan                      | 2,321                             | Age: 64<br>Male: 45%<br>Ethnicity: Japanese                                                | DM: 8.7%<br>HTN: 57%<br>SBP: 134 mmHg                                              | BMI: 23.5 Kg/m <sup>2</sup>                                                                          | Microalbuminuria                                                                          | Demographics,<br>lifestyle, HTN,<br>DM, urinary<br>measurements         | Obesity:<br>BMI ≥25 Kg/m <sup>2</sup>                     | Non-significant                                                                                            |
| Wei et al.<br>2012(28)           | 2007.11-<br>2009.3      | China                      | 1,187                             | Age: 41<br>Male: 42%<br>Ethnicity: Chinese                                                 | DM: 5%<br>HTN: 17%<br>SBP: 114 mmHg                                                | BMI: 23.0 Kg/m <sup>2</sup>                                                                          | Albuminuria                                                                               | Demographics,<br>lipids, HTN,<br>medications                            | BMI: cut-offs (23,<br>25, 30 Kg/m <sup>2</sup> )          | Obese II vs normal weight: 2.15 (1.00-<br>2.20)                                                            |
| Belhatem<br>et al.<br>2015(29)   | 2012.1-<br>2013.12      | France                     | Cases:<br>855;<br>Controls:<br>84 | Age: cases (60),<br>control (43);<br>Male: cases (60%),<br>control (35%)<br>Ethnicity: N/A | DM: cases<br>(100%)<br>HTN: N/A<br>SBP: cases (128<br>mmHg), control<br>(123 mmHg) | BMI: cases (30.5<br>Kg/m <sup>2</sup> ), controls<br>(38.1 Kg/m <sup>2</sup> )                       | Micro- or macro-<br>albuminuria: uACR<br>ranged ≥2 times<br>within 30-300 or >300<br>mg/g | Demographics,<br>SBP, DM                                                | BMI: cut-offs (25,<br>30, 40 Kg/m <sup>2</sup> )          | Morbid obese vs normal weight:<br>Microalbuminuria: 1.99 (1.35-2.98)<br>Macroalbuminuria: 2.33 (1.25-4.22) |
| Gojaseni et<br>al.<br>2010(30)   | 2007.1-<br>2007.12      | Thailand                   | 559                               | Age: 58<br>Male: 51%<br>Ethnicity: Thai                                                    | DM: 0<br>HTN: 100%<br>SBP: 141 mmHg                                                | BMI: 26.1 Kg/m <sup>2</sup>                                                                          | Albuminuria: uACR<br>>25 mg/g (women) or<br>>17 mg/g (men)                                | Metabolic<br>syndrome, BP,<br>medication,<br>abdominal obesity          | Obesity:<br>BMI ≥30 Kg/m <sup>2</sup>                     | Overall: 2.24 (1.33-3.76)                                                                                  |
| Al-Maskari<br>et al.<br>2008(31) | 2003.9-<br>2004.5       | United<br>Arab<br>Emirates | 513                               | Age: 53<br>Male: 52%<br>Ethnicity: N/A                                                     | DM: 100%<br>HTN: 35%<br>SBP: N/A                                                   | BMI >30 Kg/m <sup>2</sup> :<br>37.7%                                                                 | Microalbuminuria:<br>UAE of 20-200 µg/min<br>or UPE rate of 30-300<br>µg/min              | Demographics,<br>T2DM, co-<br>morbidity                                 | Obesity:<br>BMI ≥25 Kg/m <sup>2</sup>                     | 0.61 (0.42-0.90)                                                                                           |
| Kohler et<br>al.<br>2000(32)     | 1994.1.1-<br>1996.12.31 | USA                        | 1,044                             | Age: 51.3<br>Male: 32%<br>Ethnicity: Black<br>Americans                                    | T2DM: 100%<br>HTN: N/A<br>SBP: N/A                                                 | BMI: 33.7 Kg/m <sup>2</sup>                                                                          | uACR                                                                                      | Demographics,<br>HbA1c, lipids, DM<br>duration, serum<br>creatinine     | BMI                                                       | β (SE): 0.0386 (0.0159)                                                                                    |
| Toto et al.<br>2010(33)          | 1994-1997               | USA                        | 652                               | Age: 60<br>Male: 61%<br>Ethnicity: African<br>American                                     | DM: N/A<br>HTN: N/A<br>SBP: 135 mmHg                                               | BMI: 31.4 Kg/m <sup>2</sup>                                                                          | % of difference in<br>geometric mean<br>uPCRs/uACRs                                       | Demographics,<br>blood glucose,<br>SBP                                  | BMI:<br>per 2-Kg/m <sup>2</sup>                           | uPCRs %: 3.5 (0.4-6.7)<br>uACRs %: 5.6 (1.6-8.9)                                                           |
| Foster et al.<br>2011(34)        | 2002.6-<br>2005.3       | USA                        | 3,099                             | Age: 53<br>Male: 52%<br>Ethnicity: N/A                                                     | DM: 6.3%<br>HTN: 32%<br>SBP: 123 mmHg                                              | BMI: 27.8 Kg/m <sup>2</sup><br>VAT: 1785 m <sup>3</sup><br>SAT: 2861.7 m <sup>3</sup><br>WC: 97.6 cm | Albuminuria: uACR<br>>25 mg/g (women) or<br>>17 mg/g (men)                                | Demographics,<br>lifestyle, SBP, DM                                     | BMI: per 1-SD<br><br>SAT:<br>per 1-SD                     | Men: 1.42 (1.20-1.68)<br>Women: Non-significant<br><br>Men: 1.28 (1.08-1.52)<br>Women: 0.75 (0.59-0.97)    |
| Kim et al.<br>2014(35)           | 2006.9-<br>2010.12      | Korea                      | 1,154                             | Age: 56<br>Male: 68%<br>Ethnicity: Korean                                                  | DM: 16.7%<br>HTN: 40.6%<br>SBP: N/A                                                | BMI: 24.4 Kg/m <sup>2</sup><br>VAT: 133 cm <sup>2</sup><br>SAT: 153 cm <sup>2</sup>                  | Microalbuminuria                                                                          | Demographics,<br>lifestyle, DM,<br>HTN, lipids,                         | SAT cross-<br>sectional area:<br>tertiles                 | Non-significant                                                                                            |

|                                |                  |                  |                              |                                                                    |                                         |                                                                                       |                                                                |                                                       |                                                       | medication                                                                                                                                            |
|--------------------------------|------------------|------------------|------------------------------|--------------------------------------------------------------------|-----------------------------------------|---------------------------------------------------------------------------------------|----------------------------------------------------------------|-------------------------------------------------------|-------------------------------------------------------|-------------------------------------------------------------------------------------------------------------------------------------------------------|
| <i>Genetic studies</i>         |                  |                  |                              |                                                                    |                                         |                                                                                       |                                                                |                                                       |                                                       |                                                                                                                                                       |
| Todd et al. 2015(6)            | N/A              | USA, UK, Finland | Cases: 2,347; control: 2,900 | Age: cases (45), controls (41)<br>Male: both 43%<br>Ethnicity: N/A | T1DM: 45%<br>HTN: N/A<br>SBP: N/A       | BMI: cases (25.7 Kg/m <sup>2</sup> ), controls (25.7 Kg/m <sup>2</sup> )              | Macroalbuminuria                                               | Age, sex, DM duration                                 | BMI                                                   | Overall: 1.71 (1.25-2.24)                                                                                                                             |
| <i>Central adiposity</i>       |                  |                  |                              |                                                                    |                                         |                                                                                       |                                                                |                                                       |                                                       |                                                                                                                                                       |
| <i>Cohort studies</i>          |                  |                  |                              |                                                                    |                                         |                                                                                       |                                                                |                                                       |                                                       |                                                                                                                                                       |
| Retnakaran et al. 2006(36)     | 1977 (1991)      | UK               | 4,031                        | Age: 53<br>Male: 60%<br>White Caucasian: 82%                       | DM: 100%<br>HTN: 45%<br>SBP: 135 mmHg   | BMI: 27.7 Kg/m <sup>2</sup><br>WC: 96 cm                                              | Microalbuminuria, macroalbuminuria                             | Demographics, lifestyle, BP, lipids, CVD              | WC                                                    | Microalbuminuria: 1.10 (1.00-1.17)<br>Macroalbuminuria: 1.17 (1.06-1.29)                                                                              |
| Bonnet et al. 2006(37)         | 6 years          | France           | 2,738                        | Age: 47<br>Male: 54%<br>Ethnicity: N/A                             | DM: 0<br>HTN: 60%<br>SBP: 129 mmHg      | BMI: 24.7 Kg/m <sup>2</sup><br>WC: 83.5 cm                                            | Elevated albuminuria: UAE ≥20 mg/L or dipstick positive        | Demographics, HTN, medication, blood glucose          | WC                                                    | Men: 1.09 (1.00-1.48)<br>Women: 1.22 (1.00-1.63)                                                                                                      |
| Boer et al. 2007(38)           | 5.8 years        | USA              | 1,279                        | Age: 30<br>Men: 53%<br>White: 97%                                  | DM: N/A<br>HTN: N/A<br>SBP: 117 mmHg    | BMI: 25.8 Kg/m <sup>2</sup><br>BMI: 82.9 cm                                           | Microalbuminuria: AER ≥30 mg/24h on two consecutive measures   | Demographics, lifestyle, DM duration, HbA1c           | WC                                                    | Overall: 1.34 (1.07-1.68)<br>Men: non-significant<br>Women: 1.65 (1.12-2.42)                                                                          |
| Rossi et al. 2009(4)           | N/A              | Italy            | 1,019                        | Age: 63<br>Male: 64%<br>Ethnicity: N/A                             | DM: 100%<br>HTN: 62%<br>SBP: N/A        | BMI: 29.2 Kg/m <sup>2</sup><br>WC: 101.3 cm                                           | Progression of UAE: doubling in ACR from baseline to follow up | Multivariable analysis with stepwise selection        | WC                                                    | Overall: 1.14 (1.00-1.32)                                                                                                                             |
| Lin et al. 2012(3)             | 2004.10 (2009.7) | Taiwan           | 2,350                        | Age: 57<br>Male: 49%<br>Ethnicity: Chinese                         | DM: 12.1%<br>HTN: N/A<br>SBP: 136 mmHg  | BMI: 24.3 Kg/m <sup>2</sup><br>WC: 81.4 cm                                            | Albuminuria: uACR≥30 mg/g                                      | Demographics, lifestyle, BP, FPG, eGFR, BMI           | Abdominal obesity: WC ≥90 cm (men) or ≥ 80 cm (women) | Overall: 2.12 (1.01-4.44)<br>Men: non-significant<br>Women: 3.13 (1.06-9.22)                                                                          |
| Odagiri et al. 2014(39)        | 2008 (2.7 years) | Japan            | 4,841                        | Age: median (42)<br>Male: 76%<br>Ethnicity: Japanese               | DM: 3.4%<br>HTN: 8.8%<br>SBP: 115 mmHg  | BMI: 22 Kg/m <sup>2</sup>                                                             | Proteinuria                                                    | Demographics, lifestyle, HTN, lipids, DM, HbA1c, eGFR | WHtR: quartiles                                       | Q4 vs Q1: 2.68 (1.01, 7.10)<br>Non-significant with adjustment of BMI                                                                                 |
| <i>Cross-sectional studies</i> |                  |                  |                              |                                                                    |                                         |                                                                                       |                                                                |                                                       |                                                       |                                                                                                                                                       |
| Tseng et al. 2005(13)          | N/A              | N/A              | 569                          | Age: 64<br>Male: 50%<br>Ethnicity: N/A                             | DM: 100%<br>HTN: N/A<br>SBP: 136 mmHg   | BMI: 25 Kg/m <sup>2</sup><br>WC: 89 cm<br>WHtR: 0.56<br>WHR: 0.95                     | Microalbuminuria                                               | N/A                                                   | WHR: per 0.1-unit<br>WC<br>WHtR: per 0.1-unit         | Men: non-significant<br>Women: 1.32 (0.97-1.80)<br>Men: non-significant<br>Women: 1.33 (1.03-1.71)<br>Men: non-significant<br>Women: 1.64 (1.13-2.40) |
| Du et al. 2014(26)             | 2010.1-2010.5    | Suzhou, China    | 2,889                        | Age: 54<br>Male: 39%<br>Ethnicity: Chinese                         | DM: 100%<br>HTN: 50.3%<br>SBP: 131 mmHg | BMI: 24.8 Kg/m <sup>2</sup><br>WHR: 0.89                                              | Albuminuria: uACR ≥17 mg/g (men) or ≥25 mg/g (women)           | Demographics, lifestyle, HTN, blood glucose, lipids   | WHR: ≥0.9 (men) or ≥ 0.85 (women)                     | Overall: 1.31 (1.08-1.60)                                                                                                                             |
| Wang et al. 2016(40)           | 2008.3-2010.2    | China            | 1,709                        | Age: 61<br>Male: 42%<br>Ethnicity: Chinese                         | T2DM: 100%<br>SBP: 149 mmHg             | BMI: 26.2 Kg/m <sup>2</sup><br>WC: 86.7 cm<br>HC: 95.3 cm                             | Increased albuminuria: uACR≥10.18 mg/g                         | Demographics, lifestyle, family history               | WHR: Sex-specific quartiles                           | Each quartile increment:<br>Overall: 1.23 (1.12-1.35)<br>Positive after adjustments of mediators and BMI                                              |
| Foster et al. 2011(34)         | 2002.6-2005.3    | USA              | 3,099                        | Age: 53<br>Male: 52%<br>Ethnicity: N/A                             | DM: 6.3%<br>HTN: 32%<br>SBP: 123 mmHg   | BMI: 27.8 Kg/m <sup>2</sup><br>VAT: 1785 m <sup>3</sup><br>SAT: 2861.7 m <sup>3</sup> | Albuminuria: uACR >25 (women) or >17 mg/g (men)                | Demographics, lifestyle, HTN, DM                      | WC: per 1-SD                                          | Men: 1.36 (1.14-1.63)<br>Women: non-significant                                                                                                       |

|                          |                |              |        |                                                                          |                                         |                                                                                        |                                                                                   |                                                      |                                                            |                                                                                                                  |
|--------------------------|----------------|--------------|--------|--------------------------------------------------------------------------|-----------------------------------------|----------------------------------------------------------------------------------------|-----------------------------------------------------------------------------------|------------------------------------------------------|------------------------------------------------------------|------------------------------------------------------------------------------------------------------------------|
|                          |                |              |        |                                                                          |                                         | WC: 97.6 cm                                                                            |                                                                                   |                                                      | VAT:<br>per 1-SD                                           | Men: 1.34 (1.12-1.60)<br>Women: non-significant                                                                  |
| Chang et al. 2006(41)    | 2004.1-2004.12 | Korea        | 1,321  | Age: 45<br>Male: 100%<br>Ethnicity: Korean                               | DM: 0<br>HTN: 0<br>SBP: 112 mmHg        | BMI: 23.8 Kg/m <sup>2</sup><br>WC: 83 cm                                               | Microalbuminuria                                                                  | Demographics, lifestyle, BP, glucose, lipids, WC     | WC                                                         | Overall: 1.79 (1.10-2.83)                                                                                        |
| Rossi et al. 2010(4)     | N/A            | Italy        | 1,019  | Age: 63<br>Male: 64%<br>Ethnicity: N/A                                   | DM: 100%<br>HTN: 62%<br>SBP: N/A        | BMI: 29.2 Kg/m <sup>2</sup><br>WC: 101.3 cm                                            | Progression of UAE: doubling in ACR from baseline to follow-up                    | Multivariable analysis with stepwise selection       | WC                                                         | Overall: 1.14 (1.00-1.32)                                                                                        |
| Liu et al. 2015(12)      | 2012.6-2013.2  | China        | 944    | Age: 61<br>Male: 44%<br>Ethnicity: Chinese                               | DM: 15.3%<br>HTN: 100%<br>SBP: 147 mmHg | BMI: 24.5 Kg/m <sup>2</sup><br>WC: 87.1 cm                                             | Microalbuminuria                                                                  | Age, SBP, FPG                                        | WC                                                         | Non-significant                                                                                                  |
| Bohm et al. 2007(42)     | N/A            | 26 countries | 21,050 | Age: 62<br>Male: 52%                                                     | DM: 4.9%<br>HTN: 100%<br>SBP: 149 mmHg  | BMI: 28.9 Kg/m <sup>2</sup><br>WHR: 0.95                                               | Microalbuminuria: dipstick urinalysis                                             | Multivariable analysis with stepwise selection       | WC: high vs normal                                         | Overall: 1.13 (1.04-1.24)                                                                                        |
| Thoenes et al. 2009(18)  | 2005-2006      | 26 countries | 20,868 | Age: 62.4<br>Male: 52.3%<br>Ethnicity: N/A                               | DM: 27.5%<br>SBP: 149 mmHg              | BMI: 28.9 Kg/m <sup>2</sup><br>WHR: 0.95<br>WC: 99.4 cm                                | Microalbuminuria: albumin excretion of 30, 80, or 150 mg/L in dipstick urinalysis | Multivariable analysis with stepwise selection       | WC: ≥102 cm (men) or ≥ 88 cm (women)                       | Overall: 1.13 (1.04-1.23)                                                                                        |
| Kim et al. 2017(19)      | 2011-2014      | Korea        | 19,331 | Age: 46<br>Male: 45%<br>Ethnicity: Korean                                | DM: 10.2%<br>HTN: 29%<br>SBP: 117 mmHg  | BMI: 23.7 Kg/m <sup>2</sup><br>WC: 80.7 cm                                             | Albuminuria                                                                       | Demographics, lifestyle, SBP, HbA1c, lipids          | WC: Sex-specific quartiles                                 | Q4 vs Q2:<br>Men: 2.17 (1.57-2.98)<br>Women: 1.79 (1.33-2.40)                                                    |
| Zhang et al. 2008(43)    | N/A            | China        | 13,925 | Age: 40<br>Male: 54%<br>Ethnicity: Chinese                               | DM: 6.3%<br>HTN: 30%<br>SBP: N/A        | Abdominal obesity: 38.5%                                                               | Albuminuria: uACR >25 (women) or >17 mg/g (men)                                   | Demographics, lifestyle, medication, HTN, DM, lipids | Abdominal obesity: WC ≥90 cm (men) or ≥ 80 cm (women)      | Overall: 1.40 (1.18-1.65)                                                                                        |
| Ren et al. 2016(21)      | 2011.6-2011.11 | China        | 8,600  | Age: 56<br>Male: 29%<br>Ethnicity: Chinese                               | DM: N/A<br>HTN: N/A<br>SBP: 126 mmHg    | BMI: 23.6 Kg/m <sup>2</sup><br>WC: 81.7 cm                                             | Albuminuria                                                                       | Demographics, lifestyle, lipids, HbA1c, HOMA-IR, SBP | WC: quartiles                                              | Q4 vs Q1: 1.73 (1.29-2.32)                                                                                       |
| Sarathy et al. 2016(44)  | 1999-2010      | USA          | 6,918  | Age: 30<br>Male: 46%<br>Non-Hispanic white: 47%                          | DM: 2.0%<br>HTN: 12%<br>SBP: 115 mmHg   | BMI: 28.2 Kg/m <sup>2</sup><br>Abdominal obesity: 43.3%                                | Albuminuria                                                                       | Demographics, lifestyle, lipids, HbA1c, SBP          | Abdominal obesity: WC ≥102 cm (men) or ≥ 88 cm (women)     | Non-Hispanic Whites: non-significant<br>Non-Hispanic Blacks: non-significant<br>Mexican-Americans: 3.0 (1.7-5.4) |
| Noh et al. 2017(23)      | 2010-2012      | Korea        | 3,841  | Age: approximate 43<br>Male: 45%<br>Ethnicity: Korean                    | DM: N/A<br>HTN: N/A<br>SBP: 120 mmHg    | BMI: 23.4 Kg/m <sup>2</sup><br>WC: 80.1 cm<br>WHtR: 0.49                               | Albuminuria                                                                       | Demographics, lifestyle                              | WC: sex-specific quartiles                                 | Male: non-significant<br>Female:<br>Q4 vs Q2: 2.29 (1.17-4.49) (significant with adjustments of mediators)       |
|                          |                |              |        |                                                                          |                                         |                                                                                        |                                                                                   |                                                      | WHtR: sex-specific quartiles                               | Male: non-significant<br>Female:<br>Q4 vs Q2: 2.12 (1.07-4.19) (significant with adjustments of mediators)       |
| Dittmann et al. 2013(24) | 1997.10-2001.3 | Germany      | 3,749  | Age: median (men [52], women [49])<br>Male: 51.3<br>Ethnicity: Caucasian | DM: 8.5%<br>HTN: 52.6%<br>SBP: N/A      | WC (median): men (95.5 cm), women (82.5 cm)<br>WHtR (median): men (0.55), women (0.50) | Microalbuminuria: uACR ≥2.5 mg/mmol (men) or ≥3.5 mg/mmol (women)                 | Age, sex, T2DM, HTN                                  | WC: sex-specific quartiles<br>WHtR: sex-specific quartiles | Q1 vs Q3: 1.48 (1.06-2.06)<br>Q5 vs Q3: 1.52 (1.16-2.00)<br>Q5 vs Q3: 1.33 (1.03-1.74)                           |

|                          |                |          |       |                                                   |                                        |                                                                                     |                                                      |                                                      |                                                               |                                                                              |
|--------------------------|----------------|----------|-------|---------------------------------------------------|----------------------------------------|-------------------------------------------------------------------------------------|------------------------------------------------------|------------------------------------------------------|---------------------------------------------------------------|------------------------------------------------------------------------------|
| Seo et al. 2016(25)      | 2013           | Korea    | 3,257 | Age: 50<br>Male: 44<br>Ethnicity: Korean          | DM: 0<br>HTN: 0<br>SBP: 115 mmHg       | BMI: 23.7 Kg/m <sup>2</sup><br>WC: 80.4 cm                                          | Microalbuminuria                                     | Demographics, glucose, HbA1c, BP, lipids, BMI        | Abdominal obesity: WC ≥90 cm (men) or ≥ 80 cm (women)         | Non-significant                                                              |
| Nguyen et al. 2008(45)   | 1999-2004      | USA      | 2,515 | Age: 15<br>Male: 53%<br>Non-Hispanic white: 26.8% | DM: 0.4%<br>HTN: 2.9%<br>SBP: N/A      | Abdominal obesity: 20%                                                              | Microalbuminuria                                     | Demographics                                         | Abdominal obesity: WC ≥90% or >88 cm (women) and >102cm (men) | Non-significant                                                              |
| Lin et al. 2012(3)       | 2004.10        | Taiwan   | 2,350 | Age: 57<br>Male: 49%<br>Ethnicity: Chinese        | DM: 12.1%<br>HTN: N/A<br>SBP: 136 mmHg | BMI: 24.3 Kg/m <sup>2</sup><br>WC: 81.4 cm                                          | Albuminuria                                          | Demographics, lifestyle, BP, CRP, glucose, eGFR, BMI | Abdominal obesity: WC ≥90 cm (men) or 80 cm (women)           | Overall: 1.73 (1.04-2.85)<br>Men: non-significant<br>Women: 2.35 (1.10-5.01) |
| Gojaseni et al. 2010(30) | 2007.1-2007.12 | Thailand | 559   | Age: 58<br>Male: 51%<br>Ethnicity: Thai           | DM: 0<br>HTN: 100%<br>SBP: 141 mmHg    | BMI: 26.1 Kg/m <sup>2</sup>                                                         | Albuminuria: uACR >25 mg/g (women) or >17 mg/g (men) | Metabolic syndrome, BP, medication, obesity          | Abdominal obesity: WC ≥90 cm (men) or ≥ 80 cm (women)         | Non-significant                                                              |
| Kim et al. 2014(35)      | 2006.9-2010.12 | Korea    | 1,154 | Age: 56<br>Male: 68%<br>Ethnicity: Korean         | DM: 16.7%<br>HTN: 40.6%<br>SBP: N/A    | BMI: 24.4 Kg/m <sup>2</sup><br>VAT: 133 cm <sup>2</sup><br>SAT: 153 cm <sup>2</sup> | Microalbuminuria                                     | Demographics, lifestyle, DM, HTN, lipids, medication | VAT cross-sectional area: tertiles                            | Overall: T3 vs T1: 1.96 (1.12-3.43)                                          |

#### General +central adiposity

##### Cross-sectional studies

|                               |     |             |       |                                        |                                      |                                          |                  |                                                           |                                                                  |                                                           |
|-------------------------------|-----|-------------|-------|----------------------------------------|--------------------------------------|------------------------------------------|------------------|-----------------------------------------------------------|------------------------------------------------------------------|-----------------------------------------------------------|
| Pinto-Sietsma et al. 2003(46) | N/A | Netherlands | 7,587 | Age: 48<br>Male: 51%<br>Caucasian: 97% | DM: N/A<br>HTN: 30%<br>SBP: 128 mmHg | BMI: 25.9 Kg/m <sup>2</sup><br>WHR: 0.88 | Microalbuminuria | Demographics, lifestyle, SBP, medication, lipids, glucose | BMI (25, 30 Kg/m <sup>2</sup> ) and WHR (0.9 [men], 0.8 [women]) | Obese central fat vs lean peripheral fat: 1.7 (1.19-2.35) |
|-------------------------------|-----|-------------|-------|----------------------------------------|--------------------------------------|------------------------------------------|------------------|-----------------------------------------------------------|------------------------------------------------------------------|-----------------------------------------------------------|

\* ORs or HRs of per 1-unit higher adiposity were converted to per 5-Kg/m<sup>2</sup> higher BMI and per 10-cm higher waist circumference for comparisons, which approximately equals ORs/HRs of per 1-SD higher adiposity in UK Biobank, unless otherwise stated.

Proteinuria is defined as grade ≥1+ in dipstick urinalysis; microalbuminuria is defined as uACR between 30-300 mg/g; macroalbuminuria is defined as uACR≥300 mg/g, and albuminuria is defined as uACR≥30 mg/g unless otherwise stated.

OR: odds ratio, HR: hazard ratio, DM: diabetes mellitus, HTN: hypertension, SBP: systolic blood pressure, WHR: waist-to-hip ratio, uACR: urinary albumin to creatinine ratio, HbA1c: haemoglobin A1c, BMI: body mass index, WC: waist circumference, eGFR: estimated glomerular filtration rate, VAT: visceral adipose tissue, SAT: subcutaneous adipose tissue, CVD: cardiovascular disease, BP: blood pressure, uPCR: urinary protein to creatinine ratio, T2DM: type 2 diabetes



## References

1. Jang CM, Hyun YY, Lee KB, Kim H. The association between underweight and the development of albuminuria is different between sexes in relatively healthy Korean subjects. *Nephrology Dialysis Transplantation*. 2014 Nov;29(11):2106-13.
2. Cederholm J, Eliasson B, Nilsson PM, Weiss L, Gudbjornsdottir S. Microalbuminuria and risk factors in type 1 and type 2 diabetic patients. *Diabetes Res Clin Pract*. 2005 Mar;67(3):258-66.
3. Lin WY, Pi-Sunyer FX, Liu CS, Li CI, Davidson LE, Li TC, et al. Central obesity and albuminuria: both cross-sectional and longitudinal studies in Chinese. *PLoS One*. 2012;7(12):e47960.
4. Rossi MCE, Nicolucci A, Pellegrini F, Comaschi M, Ceriello A, Cucinotta D, et al. Obesity and changes in urine albumin/creatinine ratio in patients with type 2 diabetes: The DEMAND Study: Nutrition, Metabolism and Cardiovascular Diseases. *Nutr Metab Cardiovasc Dis*. 2010 Feb;20(2):110-6.
5. Tozawa M, Iseki K, Iseki C, Oshiro S, Ikemiya Y, Takishita S. Influence of smoking and obesity on the development of proteinuria. *Kidney Int*. 2002 Sep;62(3):956-62.
6. Todd JN, Dahlstrom EH, Salem RM, Sandholm N, Forsblom C, McKnight AJ, et al. Genetic evidence for a causal role of obesity in diabetic kidney disease. *Diabetes*. 2015 Dec;64(12):4238-46.
7. Chang A, Van Horn L, Jacobs Jr DR, Liu K, Muntner P, Newsome B, et al. Lifestyle-related factors, obesity, and incident microalbuminuria: The CARDIA (Coronary Artery Risk Development in Young Adults) study. *Am J Kidney Dis*. 2013 Aug;62(2):267-75.
8. Bello AK, de Zeeuw D, El Nahas M, Brantsma AH, Bakker SJL, de Jong PE, et al. Impact of weight change on albuminuria in the general population. *Nephrol Dial Transplant*. 2007 Jun;22(6):1619-27.
9. Amini M, Safaei H, Aminorroaya A. The incidence of microalbuminuria and its associated risk factors in type 2 diabetic patients in Isfahan, Iran. *Rev Diabet Stud*. 2007 Winter; 4(4): 242–248.
10. Zheng J, Ye P, Wang X, Xiao WK, Wu HM. [The relationship between obesity and microalbuminuria among general population in Beijing area]. [Chinese]. *Chung Hua Nei Ke Tsa Chih Chinese Journal of Internal Medicine*. 2011;50(5):388-92.
11. Zheng J, Ye P, Wang F, Xiao WK, Wu HM. [Prevalence of microalbuminuria and its related factors among different genders in general population of Beijing]. [Chinese]. *Chung Hua Liu Hsing Ping Hsueh Tsa Chih Chinese Journal of Epidemiology*. 2010;31(11):1250-4.
12. Liu X, Liu Y, Chen Y, Li Y, Shao X, Liang Y, et al. Body mass index (BMI) is associated with microalbuminuria in Chinese hypertensive patients. *Int J Environ Res Public Health*. 2015 Feb; 12(2): 1998–2008.
13. Tseng C-H. Waist-to-Height Ratio Is Independently and Better Associated With Urinary Albumin Excretion Rate Than Waist Circumference or Waist-to-Hip Ratio in Chinese Adult Type 2 Diabetic Women but Not Men. *Diabetes Care*. 2005 Sep;28(9):2249-51.
14. Kaze FF, Halle MP, Mopa HT, Ashuntantang G, Fouda H, Ngogang J, et al. Prevalence and risk factors of chronic kidney disease in urban adult Cameroonians according to three common estimators of the glomerular filtration rate: a cross-sectional study. *BMC Nephrol*. 2015; 16: 96.
15. Sato Y, Fujimoto S, Konta T, Iseki K, Moriyama T, Yamagata K, et al. U-shaped association between body mass index and proteinuria in a large Japanese general population sample. *Clin Exp Nephrol*. 2014 Feb;18(1):75-86.
16. Ramirez SP, McClellan W, Port FK, Hsu SI. Risk factors for proteinuria in a large, multiracial, southeast Asian population. *J Am Soc Nephrol*. 2002 Jul;13(7):1907-17.
17. Kim YS, Kim HS, Oh HY, Lee MK, Kim CH, Kim YS, et al. Prevalence of microalbuminuria and associated risk factors among adult Korean hypertensive patients in a primary care setting. *Hypertens Res*. 2013 Sep;36(9):807-23.
18. Thoenes M, Reil JC, Khan BV, Bramlage P, Volpe M, Kirch W, et al. Abdominal obesity is associated with microalbuminuria and an elevated cardiovascular risk profile in patients with hypertension. *Vasc Health Risk Manag*. 2009;5(4):577-85.
19. Kim YJ, Hwang SD, Oh TJ, Kim KM, Jang HC, Kimm H, et al. Association Between Obesity and Chronic Kidney Disease, Defined by Both Glomerular Filtration Rate and Albuminuria, in Korean Adults. *Metab Syndr Relat Disord*. 2017 Oct;15(8):416-422.

20. Lin B, Shao L, Luo Q, Ou-yang L, Zhou F, Du B, et al. Prevalence of chronic kidney disease and its association with metabolic diseases: a cross-sectional survey in Zhejiang province, Eastern China. *BMC Nephrol.* 2014; 15: 36.
21. Ren M, Sun K, Li F, Qi YQ, Lin DZ, Li N, et al. Association between obesity measures and albuminuria: A population-based study. *J Diabetes Complications.* 2016 Apr;30(3):451-6.
22. Kang YU, Bae EH, Ma SK, Kim SW. Determinants and burden of chronic kidney disease in a high-risk population in Korea: results from a cross-sectional study. *Korean J Intern Med.* 2016 Sep;31(5):920-9.
23. Noh HM, Kim UY, Park YS, Song YR, Oh HY, Park KH, et al. Sex differences in the association between obesity and albuminuria among Korean adults: a cross-sectional study using the Korea National Health and Nutrition Examination Survey data. *Clin Exp Nephrol.* 2017 Feb;21(1):27-34.
24. Dittmann K, Hannemann A, Wallaschofski H, Rettig R, Stracke S, Volzke H, et al. U-shaped association between central body fat and the urinary albumin-to-creatinine ratio and microalbuminuria. *BMC Nephrol.* 2013 Apr;14:87.
25. Seo WJ, Lee GM, Hwang JH, Lee MN, Kang HC. Association between Body Mass Index, Waist Circumference and Prevalence of Microalbuminuria in Korean Adults of Age 30 Years and Older without Diabetes, Hypertension, Renal Failure, or Overt Proteinuria: The 2013 Korean National Health and Nutrition Examination Survey. *Korean J Fam Med.* 2016 Jan;37(1):57-63.
26. Du N, Peng H, Chao X, Zhang Q, Tian H, Li H. Interaction of obesity and central obesity on elevated urinary albumin-to-creatinine ratio. *PLoS One.* 2014 Jun 3;9(6):e98926.
27. Konta T, Hao Z, Abiko H, Ishikawa M, Takahashi T, Ikeda A, et al. Prevalence and risk factor analysis of microalbuminuria in Japanese general population: the Takahata study. *Kidney Int.* 2006 Aug;70(4):751-6.
28. Wei X, Li Z, Chen W, Mao H, Li Z, Dong X, et al. Prevalence and risk factors of chronic kidney disease in first-degree relatives of chronic kidney disease patients in Southern China. *Nephrology.* 2012;17(2):123-30.
29. Belhatem N, Mohammedi K, Rouzet F, Matallah N, Al Baloshi A, Travert F, et al. Impact of morbid obesity on the kidney function of patients with type 2 diabetes. *Diabetes Res Clin Pract.* 2015 Apr;108(1):143-9.
30. Gojaseni P, Phaopha A, Chailimpamontree W, Pajareya T, Chittinandana A. Prevalence and risk factors of microalbuminuria in Thai nondiabetic hypertensive patients. *Vasc Health Risk Manag.* 2010 Mar 24;6:157-65.
31. Al-Maskari F, El-Sadig M, Obineche E. Prevalence and determinants of microalbuminuria among diabetic patients in the United Arab Emirates. *BMC Nephrol.* 2008 Jan 29;9:1.
32. Kohler KA, McClellan WM, Ziemer DC, Kleinbaum DG, Boring JR. Risk factors for microalbuminuria in black americans with newly diagnosed type 2 diabetes. *Am J Kidney Dis.* 2000 Nov;36(5):903-13.
33. Toto RD, Greene T, Hebert LA, Hiremath L, Lea JP, Lewis JB, et al. Relationship between body mass index and proteinuria in hypertensive nephrosclerosis: results from the African American Study of Kidney Disease and Hypertension (AASK) cohort. *Am J Kidney Dis.* 2010 Nov;56(5):896-906.
34. Foster MC, Hwang SJ, Massaro JM, Hoffmann U, DeBoer IH, Robins SJ, et al. Association of subcutaneous and visceral adiposity with albuminuria: the Framingham Heart Study. *Obesity.* 2011 Jun;19(6):1284-9.
35. Kim H, Kim HJ, Shin N, Han M, Park H, Kim M, et al. Visceral obesity is associated with microalbuminuria in nondiabetic Asians. *Hypertens Res.* 2014 Jul;37(7):679-84.
36. Retnakaran R, Cull CA, Thorne KI, Adler AI, Holman RR. Risk factors for renal dysfunction in type 2 diabetes: U.K. Prospective Diabetes Study 74. *Diabetes.* 2006 Jun;55(6):1832-9.
37. Bonnet F, Marre M, Halimi JM, Stengel B, Lange C, Laville M, et al. Waist circumference and the metabolic syndrome predict the development of elevated albuminuria in non-diabetic subjects: the DESIR Study. *J Hypertens.* 2006 Jun;24(6):1157-63.
38. de Boer IH, Sibley SD, Kestenbaum B, Sampson JN, Young B, Cleary PA, et al. Central obesity, incident microalbuminuria, and change in creatinine clearance in the epidemiology of diabetes interventions and complications study. *J Am Soc Nephrol.* 2007 Jan;18(1):235-43.
39. Odagiri K, Mizuta I, Yamamoto M, Miyazaki Y, Watanabe H, Uehara A. Waist to height ratio is an independent predictor for the incidence of chronic kidney disease. *PLoS One.* 2014 Feb 12;9(2):e88873.

40. Wang Z, Ding L, Huang X, Sun W, Lin L, Huang Y, et al. Abdominal adiposity contributes to adverse glycemic control and albuminuria in Chinese type 2 diabetic patients: A cross-sectional study. *J Diabetes*. 2017 Mar;9(3):285-295.
41. Chang Y, Yoo T, Ryu S, Huh BY, Cho BL, Sung E, et al. Abdominal obesity, systolic blood pressure, and microalbuminuria in normotensive and euglycemic Korean men. *Int J Obes*. 2006 May;30(5):800-4.
42. Bohm M, Thoenes M, Danchin N, Reil JC, Volpe M. Overview of the i-SEARCH Global Study : Cardiovascular Risk Factors and Microalbuminuria in Hypertensive Individuals. *High Blood Press Cardiovasc Prev*. 2008 Oct;15(4):217-24.
43. Zhang L, Zhang P, Wang F, Zuo L, Zhou Y, Shi Y, et al. Prevalence and factors associated with CKD: a population study from Beijing. *Am J Kidney Dis*. 2008 Mar;51(3):373-84.
44. Sarathy H, Henriquez G, Abramowitz MK, Kramer H, Rosas SE, Johns T, et al. Abdominal obesity, race and chronic kidney disease in young adults: Results from NHANES 1999-2010. *PLoS One*. 2016 May 25;11(5):e0153588.
45. Nguyen S, McCulloch C, Brakeman P, Portale A, Hsu CY. Being overweight modifies the association between cardiovascular risk factors and microalbuminuria in adolescents. *Pediatrics*. 2008 Jan;121(1):37-45.
46. Pinto-Sietsma SJ, Navis G, Janssen WM, de Zeeuw D, Gans RO, de Jong PE, et al. A central body fat distribution is related to renal function impairment, even in lean subjects. *Am J Kidney Dis*. 2003 Apr;41(4):733-41.

**Table S3: Baseline characteristics of UK Biobank by fifths of waist-to-hip ratio**

| Characteristics                                  | I                 | II               | III              | IV               | V                | All (n=408,527)  |
|--------------------------------------------------|-------------------|------------------|------------------|------------------|------------------|------------------|
| <b>Adiposity</b>                                 |                   |                  |                  |                  |                  |                  |
| Waist-to-hip ratio                               | 0.78 (0.06)       | 0.83 (0.06)      | 0.87 (0.06)      | 0.91 (0.06)      | 0.97 (0.06)      | 0.87 (0.09)      |
| Waist-to-height ratio                            | 0.46 (0.05)       | 0.50 (0.05)      | 0.53 (0.05)      | 0.57 (0.05)      | 0.62 (0.05)      | 0.53 (0.07)      |
| Waist circumference (cm)                         | 78 (10)           | 85 (10)          | 90 (10)          | 95 (10)          | 103 (10)         | 90 (13)          |
| Trunk fat (%)                                    | 25.8 (7.2)        | 29.0 (7.1)       | 31.2 (7.1)       | 33.3 (7.1)       | 35.7 (7.1)       | 31.0 (7.9)       |
| BMI (kg/m <sup>2</sup> )                         | 24.1 (4.1)        | 25.8 (4.1)       | 27.2 (4.1)       | 28.8 (4.1)       | 31.0 (4.1)       | 27.4 (4.7)       |
| Height-adjusted weight (kg)                      | 68.8 (13.6)       | 73.7 (13.5)      | 77.5 (13.5)      | 82.1 (13.5)      | 88.1 (13.6)      | 78.0 (15.0)      |
| Hip circumference (cm)                           | 100 (9)           | 101 (9)          | 103 (9)          | 105 (9)          | 107 (9)          | 103 (9)          |
| Body fat (%)                                     | 26.4 (7.9)        | 29.2 (7.8)       | 31.4 (7.8)       | 33.3 (7.8)       | 35.8 (7.9)       | 31.2 (8.5)       |
| <b>Socio-demographics</b>                        |                   |                  |                  |                  |                  |                  |
| Age, years                                       | 53.9 (8.3)        | 55.4 (8.2)       | 56.4 (8.0)       | 57.3 (7.8)       | 58.1 (7.6)       | 56.2 (8.1)       |
| White                                            | 77,800 (95.9%)    | 77,762 (95.5%)   | 77,534 (94.7%)   | 76,401 (94.0%)   | 76,400 (92.3%)   | 385,897 (94.5%)  |
| College or University degree                     | 34,241 (40.2%)    | 29,644 (35.6%)   | 26,586 (32.4%)   | 23,015 (28.8%)   | 19,669 (24.7%)   | 133,155 (32.6%)  |
| Townsend deprivation score                       | -2.4 (-3.8, -0.0) | -2.4 (-3.8, 0.1) | -2.3 (-3.7, 0.3) | -2.1 (-3.6, 0.6) | -1.7 (-3.4, 1.3) | -2.2 (-3.7, 0.5) |
| <b>Lifestyle</b>                                 |                   |                  |                  |                  |                  |                  |
| Current smoker                                   | 7,129 (8.0%)      | 8,037 (9.5%)     | 8,546 (10.4%)    | 8,870 (11.2%)    | 10,056 (12.9%)   | 42,638 (10.4%)   |
| Daily drinker                                    | 16,287 (20.9%)    | 17,393 (21.6%)   | 17,212 (20.9%)   | 16,730 (20.2%)   | 15,647 (18.3%)   | 83,269 (20.4%)   |
| Physical activity (MET-hr/wk)                    | 35.9 (34.5)       | 33.5 (34.4)      | 32.2 (34.6)      | 30.5 (34.9)      | 28.4 (35.5)      | 32.2 (33.3)      |
| Urinary sodium-to-creatinine ratio (mmol/mmol) § | 9.5 (6.4, 13.5)   | 9.6 (6.5, 13.5)  | 9.6 (6.5, 13.6)  | 9.6 (6.4, 13.7)  | 9.7 (6.4, 14.0)  | 9.6 (6.4, 13.7)  |
| <b>Health status</b>                             |                   |                  |                  |                  |                  |                  |
| Diabetes †                                       | 1,319 (1.4%)      | 2,060 (2.1%)     | 3,224 (3.1%)     | 5,405 (5.2%)     | 11,629 (10.9%)   | 23,637 (5.8%)    |
| HbA1c (%)                                        | 6.7 (6.0, 7.7)    | 6.7 (6.0, 7.4)   | 6.7 (6.1, 7.4)   | 6.7 (6.2, 7.4)   | 6.9 (6.3, 7.7)   | 6.8 (6.2, 7.6)   |
| Duration of diabetes, years                      | 6.0 (1.0, 20.0)   | 4.0 (1.0, 10.0)  | 3.0 (0.0, 9.0)   | 3.0 (0.0, 8.0)   | 4.0 (0.0, 8.0)   | 4.0 (0.0, 9.0)   |
| Prediabetes †                                    | 824 (1.0%)        | 1,293 (1.4%)     | 2,080 (2.2%)     | 3,155 (3.2%)     | 5,155 (5.1%)     | 12,507 (3.1%)    |
| HbA1c (%)                                        | 6.1 (6.0, 6.2)    | 6.1 (6.0, 6.2)   | 6.1 (6.0, 6.2)   | 6.1 (6.0, 6.2)   | 6.1 (6.1, 6.3)   | 6.1 (6.0, 6.2)   |
| Prediabetes †                                    | 79,534 (97.6%)    | 78,331 (96.5%)   | 76,618 (94.7%)   | 72,527 (91.5%)   | 65,373 (83.6%)   | 372,383 (91.2%)  |
| HbA1c (%)                                        | 5.3 (5.1, 5.5)    | 5.3 (5.1, 5.5)   | 5.3 (5.1, 5.5)   | 5.4 (5.2, 5.6)   | 5.4 (5.2, 5.6)   | 5.3 (5.1, 5.5)   |
| Any vascular diseases ‡                          | 2,164 (3.0%)      | 3,125 (3.9%)     | 4,052 (4.7%)     | 5,301 (5.8%)     | 7,676 (7.9%)     | 22,318 (5.5%)    |
| Systolic blood pressure (mmHg)                   | 134 (18)          | 137 (17)         | 138 (17)         | 139 (17)         | 140 (18)         | 138 (19)         |
| Diastolic blood pressure (mmHg)                  | 79 (10)           | 81 (10)          | 83 (10)          | 84 (10)          | 85 (10)          | 82 (10)          |
| eGFR (mL/min/1.73m <sup>2</sup> ) §              | 91.5 (12.0)       | 91.3 (11.9)      | 91.2 (11.9)      | 91.0 (11.9)      | 90.9 (12.0)      | 91.2 (13.2)      |
| <b>Outcome</b>                                   |                   |                  |                  |                  |                  |                  |
| Urinary albumin-to-creatinine ratio (mg/mmol) §  | 1.0 (0.6, 1.9)    | 1.0 (0.6, 1.9)   | 1.0 (0.6, 1.9)   | 1.0 (0.6, 2.0)   | 1.1 (0.7, 2.4)   | 1.0 (0.6, 2.0)   |

Age-adjusted mean (SD), N (%), or median (Q1, Q3) shown by fifths of waist-to-hip ratio and arithmetic mean (SD), N (%) or median (Q1, Q3) shown overall, unless otherwise stated. BMI: body mass index, HbA1c: glycosylated haemoglobin, eGFR: estimated glomerular filtration rate. § Mean (SD) or median (Q1, Q3) among those with detectable values. † Diabetes is defined as self-reported diabetes or HbA1c $\geq$ 6.5%, prediabetes is defined as HbA1c between 5.7- $<$ 6.5%, no diabetes is defined as HbA1c $<$ 5.7%. ‡ Any vascular diseases include self-reported heart attack, angina, or stroke. § eGFR was calculated from the Chronic Kidney Disease Epidemiology Collaboration (CKD-EPI) creatinine equation. Exclusion criteria: participants with self-reported cancer, chronic obstructive pulmonary disease or liver failure/cirrhosis; with missing values of adiposity measures, blood pressure, HbA1c, or urinary albumin-to-creatinine ratio.

**Table S4: Baseline characteristics of UK Biobank by fifths of BMI**

| Characteristics                                  | I                | II                | III              | IV               | V                | All (n=408,527)  |
|--------------------------------------------------|------------------|-------------------|------------------|------------------|------------------|------------------|
| <b>Adiposity</b>                                 |                  |                   |                  |                  |                  |                  |
| Waist-to-hip ratio                               | 0.82 (0.08)      | 0.85 (0.08)       | 0.87 (0.08)      | 0.89 (0.08)      | 0.92 (0.08)      | 0.87 (0.09)      |
| Waist-to-height ratio                            | 0.46 (0.04)      | 0.50 (0.04)       | 0.53 (0.04)      | 0.56 (0.04)      | 0.63 (0.04)      | 0.53 (0.07)      |
| Waist circumference (cm)                         | 78 (9)           | 84 (9)            | 89 (9)           | 94 (9)           | 106 (9)          | 90 (13)          |
| Trunk fat (%)                                    | 23.0 (5.7)       | 28.0 (5.7)        | 31.1 (5.7)       | 34.1 (5.7)       | 38.9 (5.7)       | 31.0 (7.9)       |
| BMI (kg/m <sup>2</sup> )                         | 21.9 (1.9)       | 24.7 (1.9)        | 26.7 (1.9)       | 29.1 (1.9)       | 34.6 (1.9)       | 27.4 (4.7)       |
| Height-adjusted weight (kg)                      | 62.7 (9.1)       | 70.5 (9.1)        | 76.1 (9.1)       | 82.9 (9.1)       | 98.0 (9.1)       | 78.0 (15.0)      |
| Hip circumference (cm)                           | 95 (6)           | 99 (6)            | 102 (6)          | 106 (6)          | 115 (6)          | 103 (9)          |
| Body fat (%)                                     | 23.8 (6.8)       | 28.3 (6.7)        | 31.1 (6.7)       | 34.0 (6.8)       | 38.8 (6.7)       | 31.2 (8.5)       |
| <b>Socio-demographics</b>                        |                  |                   |                  |                  |                  |                  |
| Age, years                                       | 55.1 (8.3)       | 56.1 (8.2)        | 56.6 (8.1)       | 56.9 (8.0)       | 56.5 (7.9)       | 56.2 (8.1)       |
| White                                            | 77,243 (94.9%)   | 77,529 (94.9%)    | 77,439 (94.7%)   | 77,034 (94.1%)   | 76,652 (93.7%)   | 385,897 (94.5%)  |
| College or University degree                     | 34,693 (41.4%)   | 29,922 (36.3%)    | 25,976 (31.8%)   | 22,884 (28.1%)   | 19,680 (23.9%)   | 133,155 (32.6%)  |
| Townsend deprivation score                       | -2.2 (-3.7, 0.4) | -2.4 (-3.8, -0.0) | -2.3 (-3.7, 0.1) | -2.2 (-3.6, 0.5) | -1.6 (-3.4, 1.4) | -2.2 (-3.7, 0.5) |
| <b>Lifestyle</b>                                 |                  |                   |                  |                  |                  |                  |
| Current smoker                                   | 10,318 (12.2%)   | 8,328 (10.1%)     | 8,130 (10.0%)    | 8,053 (10.0%)    | 7,809 (9.6%)     | 42,638 (10.4%)   |
| Daily drinker                                    | 19,515 (24.2%)   | 18,587 (22.6%)    | 17,407 (20.9%)   | 15,771 (18.8%)   | 11,989 (14.4%)   | 83,269 (20.4%)   |
| Physical activity (MET-hr/wk)                    | 35.0 (34.3)      | 34.0 (34.3)       | 32.6 (34.5)      | 31.2 (34.8)      | 27.7 (35.4)      | 32.2 (33.3)      |
| Urinary sodium-to-creatinine ratio (mmol/mmol) § | 9.8 (6.6, 13.9)  | 9.6 (6.5, 13.7)   | 9.5 (6.5, 13.6)  | 9.5 (6.4, 13.5)  | 9.5 (6.2, 13.6)  | 9.6 (6.4, 13.7)  |
| <b>Health status</b>                             |                  |                   |                  |                  |                  |                  |
| Diabetes †                                       | 1,650 (1.7%)     | 2,246 (2.2%)      | 3,188 (3.1%)     | 5,142 (4.9%)     | 11,411 (11.4%)   | 23,637 (5.8%)    |
| HbA1c (%)                                        | 6.7 (6.0, 7.7)   | 6.7 (6.1, 7.4)    | 6.7 (6.1, 7.5)   | 6.8 (6.2, 7.6)   | 6.8 (6.3, 7.6)   | 6.8 (6.2, 7.6)   |
| Duration of diabetes, years                      | 5.0 (1.0, 16.0)  | 4.0 (1.0, 11.0)   | 4.0 (0.0, 10.0)  | 4.0 (0.0, 9.0)   | 3.0 (0.0, 8.0)   | 4.0 (0.0, 9.0)   |
| Prediabetes †                                    | 1,003 (1.1%)     | 1,440 (1.5%)      | 1,985 (2.1%)     | 3,007 (3.1%)     | 5,072 (5.4%)     | 12,507 (3.1%)    |
| HbA1c (%)                                        | 6.1 (6.0, 6.2)   | 6.1 (6.0, 6.2)    | 6.1 (6.0, 6.2)   | 6.1 (6.1, 6.2)   | 6.1 (6.1, 6.3)   | 6.1 (6.0, 6.2)   |
| Prediabetes †                                    | 79,044 (97.2%)   | 78,040 (96.3%)    | 76,516 (94.9%)   | 73,566 (91.9%)   | 65,217 (82.7%)   | 372,383 (91.2%)  |
| HbA1c (%)                                        | 5.3 (5.1, 5.5)   | 5.3 (5.1, 5.5)    | 5.3 (5.1, 5.5)   | 5.4 (5.1, 5.6)   | 5.4 (5.2, 5.6)   | 5.3 (5.1, 5.5)   |
| Any vascular diseases ‡                          | 2,563 (3.2%)     | 3,236 (3.8%)      | 4,117 (4.6%)     | 5,122 (5.7%)     | 7,280 (8.5%)     | 22,318 (5.5%)    |
| Systolic blood pressure (mmHg)                   | 133 (17)         | 136 (17)          | 138 (17)         | 140 (17)         | 142 (17)         | 138 (19)         |
| Diastolic blood pressure (mmHg)                  | 78 (10)          | 81 (10)           | 82 (10)          | 84 (10)          | 86 (10)          | 82 (10)          |
| eGFR (mL/min/1.73m <sup>2</sup> ) §              | 93.2 (11.8)      | 91.6 (11.8)       | 90.9 (11.8)      | 90.2 (11.8)      | 90.0 (11.8)      | 91.2 (13.2)      |
| <b>Outcome</b>                                   |                  |                   |                  |                  |                  |                  |
| Urinary albumin-to-creatinine ratio (mg/mmol) §  | 1.1 (0.7, 2.1)   | 1.0 (0.6, 1.9)    | 1.0 (0.6, 1.9)   | 1.0 (0.6, 1.9)   | 1.1 (0.7, 2.2)   | 1.0 (0.6, 2.0)   |

Age-adjusted mean (SD), N (%), or median (Q1, Q3) shown by fifths of BMI and arithmetic mean (SD), N (%) or median (Q1, Q3) shown overall, unless otherwise stated. BMI: body mass index, HbA1c: glycosylated haemoglobin, eGFR: estimated glomerular filtration rate. § Mean (SD) or median (Q1, Q3) among those with detectable values. † Diabetes is defined as self-reported diabetes or HbA1c $\geq$ 6.5%, prediabetes is defined as HbA1c between 5.7- $<$ 6.5%, no diabetes is defined as HbA1c $<$ 5.7%. ‡ Any vascular diseases include self-reported heart attack, angina, or stroke. § eGFR was calculated from the Chronic Kidney Disease Epidemiology Collaboration (CKD-EPI) creatinine equation. Exclusion criteria: participants with self-reported cancer, chronic obstructive pulmonary disease or liver failure/cirrhosis; with missing values of adiposity measures, blood pressure, HbA1c, or urinary albumin-to-creatinine ratio.

**Table S5: Sex-specific mean waist-to-hip ratio and BMI by selected characteristics**

| Characteristics                                    | Men     |                    |                         | Women   |                    |                         |
|----------------------------------------------------|---------|--------------------|-------------------------|---------|--------------------|-------------------------|
|                                                    | N       | Waist-to-hip ratio | BMI(kg/m <sup>2</sup> ) | N       | Waist-to-hip ratio | BMI(kg/m <sup>2</sup> ) |
| <b>Age, years</b>                                  |         |                    |                         |         |                    |                         |
| 35-49                                              | 46,334  | 0.92 (0.06)        | 27.6 (4.2)              | 53,902  | 0.80 (0.07)        | 26.4 (5.3)              |
| 50-59                                              | 61,913  | 0.93 (0.06)        | 27.9 (4.3)              | 75,997  | 0.82 (0.07)        | 27.1 (5.2)              |
| 60-74                                              | 82,139  | 0.95 (0.06)        | 27.9 (4.0)              | 88,242  | 0.83 (0.07)        | 27.3 (4.8)              |
| <b>Ethnicity</b>                                   |         |                    |                         |         |                    |                         |
| White                                              | 179,611 | 0.94 (0.06)        | 27.8 (4.2)              | 206,286 | 0.82 (0.07)        | 26.9 (5.0)              |
| Others                                             | 10,775  | 0.93 (0.06)        | 27.5 (4.5)              | 11,855  | 0.84 (0.07)        | 28.0 (6.1)              |
| <b>Highest qualification completed §</b>           |         |                    |                         |         |                    |                         |
| College or University degree                       | 64,727  | 0.92 (0.06)        | 27.0 (3.9)              | 68,428  | 0.80 (0.07)        | 26.1 (4.9)              |
| A levels/GCSEs or equivalent                       | 91,424  | 0.94 (0.06)        | 28.1 (4.2)              | 111,327 | 0.82 (0.07)        | 27.2 (5.1)              |
| None of the above                                  | 34,235  | 0.96 (0.07)        | 28.6 (5.2)              | 38,386  | 0.84 (0.07)        | 28.2 (6.3)              |
| <b>UK Region</b>                                   |         |                    |                         |         |                    |                         |
| London or South                                    | 57,608  | 0.93 (0.06)        | 27.4 (4.1)              | 69,378  | 0.81 (0.07)        | 26.5 (5.0)              |
| Midlands                                           | 31,065  | 0.94 (0.06)        | 27.9 (4.2)              | 33,008  | 0.82 (0.07)        | 27.2 (5.1)              |
| North                                              | 80,014  | 0.94 (0.06)        | 28.0 (4.2)              | 90,078  | 0.82 (0.07)        | 27.2 (5.1)              |
| Wales                                              | 8,074   | 0.94 (0.06)        | 28.4 (4.3)              | 9,188   | 0.82 (0.07)        | 27.6 (5.3)              |
| Scotland                                           | 13,625  | 0.93 (0.06)        | 27.8 (4.2)              | 16,489  | 0.81 (0.07)        | 27.0 (5.0)              |
| <b>Townsend deprivation score (fifths) †</b>       |         |                    |                         |         |                    |                         |
| 1 (Least deprived)                                 | 38,595  | 0.93 (0.06)        | 27.5 (3.8)              | 44,106  | 0.81 (0.07)        | 26.3 (4.5)              |
| 2                                                  | 38,305  | 0.93 (0.06)        | 27.7 (4.0)              | 44,045  | 0.81 (0.07)        | 26.6 (4.7)              |
| 3                                                  | 38,198  | 0.93 (0.06)        | 27.8 (4.1)              | 43,926  | 0.81 (0.07)        | 26.9 (4.9)              |
| 4                                                  | 38,135  | 0.94 (0.06)        | 27.9 (4.3)              | 43,479  | 0.82 (0.07)        | 27.2 (5.2)              |
| 5 (Most deprived)                                  | 36,903  | 0.94 (0.07)        | 28.2 (4.8)              | 42,336  | 0.83 (0.07)        | 28.1 (5.8)              |
| <b>Smoking status</b>                              |         |                    |                         |         |                    |                         |
| Ever                                               | 95,511  | 0.94 (0.06)        | 28.1 (4.3)              | 86,602  | 0.82 (0.07)        | 27.1 (5.1)              |
| Never                                              | 93,945  | 0.93 (0.06)        | 27.5 (4.1)              | 130,519 | 0.81 (0.07)        | 26.9 (5.1)              |
| <b>Physical activity, MET-hr/wk ‡</b>              |         |                    |                         |         |                    |                         |
| Lower                                              | 87,094  | 0.94 (0.06)        | 28.0 (4.3)              | 97,834  | 0.82 (0.07)        | 27.4 (5.2)              |
| Higher                                             | 88,448  | 0.93 (0.06)        | 27.4 (3.9)              | 99,148  | 0.81 (0.07)        | 26.3 (4.6)              |
| <b>Urinary sodium-to-creatinine ratio (fifths)</b> |         |                    |                         |         |                    |                         |
| M: (0, 5.4]; F: (0, 6.2]                           | 38,040  | 0.94 (0.06)        | 28.0 (4.3)              | 43,503  | 0.82 (0.07)        | 27.4 (5.3)              |
| M: (5.4, 7.6]; F: (6.2, 9.0]                       | 38,041  | 0.93 (0.06)        | 27.7 (4.1)              | 43,504  | 0.82 (0.07)        | 27.0 (5.0)              |
| M: (7.6, 10.0]; F: (9.0, 12.0]                     | 38,041  | 0.93 (0.06)        | 27.7 (4.1)              | 43,503  | 0.81 (0.07)        | 26.9 (5.0)              |
| M: (10.0, 13.3]; F: (12.0, 16.2]                   | 38,041  | 0.93 (0.06)        | 27.8 (4.1)              | 43,504  | 0.82 (0.07)        | 26.9 (5.0)              |
| M: >13.3; F: >16.2                                 | 38,040  | 0.94 (0.06)        | 27.8 (4.4)              | 43,503  | 0.82 (0.07)        | 26.9 (5.1)              |
| <b>Diabetes status ¶</b>                           |         |                    |                         |         |                    |                         |
| No diabetes                                        | 169,635 | 0.93 (0.06)        | 27.5 (3.9)              | 202,748 | 0.81 (0.07)        | 26.7 (4.8)              |
| Prediabetes                                        | 6,058   | 0.97 (0.06)        | 30.3 (5.2)              | 6,449   | 0.86 (0.07)        | 31.0 (6.9)              |
| Diabetes                                           | 14,693  | 0.98 (0.07)        | 31.1 (5.7)              | 8,944   | 0.88 (0.08)        | 32.0 (6.8)              |
| <b>Any self-reported vascular diseases §</b>       |         |                    |                         |         |                    |                         |
| No                                                 | 175,020 | 0.93 (0.06)        | 27.7 (4.1)              | 211,189 | 0.82 (0.07)        | 26.9 (5.0)              |
| Yes                                                | 15,366  | 0.96 (0.07)        | 29.5 (6.0)              | 6,952   | 0.85 (0.07)        | 29.6 (7.3)              |

Arithmetic mean (SD) of adiposity measures for age, and age-adjusted mean (SD) of adiposity measures for the rest. BMI: body mass index, HbA1c: glycosylated haemoglobin, M: men, F: women. § A levels/GCSEs or equivalent include A levels, AS levels, O levels, GCSEs, CSEs, NVQ, HND, HNC, other professional qualifications or equivalent. † Range of Townsend deprivation score in each fifth by sex: women (1 [-6.3, -3.9], 2 [-3.9, -2.8], 3 [-2.8, -1.3], 4 [-1.3, 1.2], 5 [1.2, 11]); men (1 [-6.3, -3.9], 2 [-3.9, -2.8], 3 [-2.8, -1.3], 4 [-1.3, 1.4], 5 [1.4, 11]). ‡ Physical activity was categorised according to sex-specific median (women: 20.28 MET-hr/wk, men: 22.50 MET-hr/wk). ¶ Diabetes is defined as self-reported diabetes or HbA1c ≥ 6.5%, prediabetes is defined as HbA1c between 5.7- < 6.5%, no diabetes is defined as HbA1c < 5.7%. § Any vascular diseases include heart attack, angina, or stroke. Exclusion criteria: participants with self-reported cancer, chronic obstructive pulmonary disease or liver failure/cirrhosis; with missing values of adiposity measures, blood pressure, HbA1c, or urinary albumin-to-creatinine ratio.

**Table S6: Within-person variability of adiposity measures during resurveys by sex**

| <b>Adiposity</b>            | <b>No of participants</b> | <b>Mean (SD) at baseline</b> | <b>Mean (SD) at resurvey (2012-13)</b> | <b>Regression dilution ratio (MacMahon's non-parametric method)</b> | <b>Regression dilution ratio (Rosner's regression method)</b> |
|-----------------------------|---------------------------|------------------------------|----------------------------------------|---------------------------------------------------------------------|---------------------------------------------------------------|
| <b>Men</b>                  |                           |                              |                                        |                                                                     |                                                               |
| <i>Central adiposity</i>    |                           |                              |                                        |                                                                     |                                                               |
| Waist-to-hip ratio          | 8,198                     | 0.93 (0.06)                  | 0.94 (0.06)                            | 0.64                                                                | 0.71                                                          |
| Waist-to-height ratio       | 8,195                     | 0.54 (0.06)                  | 0.55 (0.06)                            | 0.83                                                                | 0.81                                                          |
| Waist circumference (cm)    | 8,200                     | 95 (11)                      | 97 (11)                                | 0.83                                                                | 0.82                                                          |
| Trunk fat (%)               | 8,116                     | 27.0 (6.6)                   | 28.1 (6.6)                             | 0.85                                                                | 0.84                                                          |
| <i>General adiposity</i>    |                           |                              |                                        |                                                                     |                                                               |
| BMI (kg/m <sup>2</sup> )    | 8,190                     | 27.3 (4.0)                   | 27.4 (4.0)                             | 0.94                                                                | 0.92                                                          |
| Height-adjusted weight (kg) | 8,190                     | 84.2 (12.3)                  | 84.3 (12.4)                            | 0.94                                                                | 0.92                                                          |
| Hip circumference (cm)      | 8,198                     | 103 (7)                      | 103 (8)                                | 0.83                                                                | 0.78                                                          |
| Body fat (%)                | 8,111                     | 24.7 (5.7)                   | 25.6 (5.7)                             | 0.87                                                                | 0.86                                                          |
| <b>Women</b>                |                           |                              |                                        |                                                                     |                                                               |
| <i>Central adiposity</i>    |                           |                              |                                        |                                                                     |                                                               |
| Waist-to-hip ratio          | 8,292                     | 0.81 (0.07)                  | 0.82 (0.06)                            | 0.65                                                                | 0.70                                                          |
| Waist-to-height ratio       | 8,289                     | 0.51 (0.07)                  | 0.52 (0.08)                            | 0.88                                                                | 0.80                                                          |
| Waist circumference (cm)    | 8,292                     | 82 (12)                      | 84 (12)                                | 0.87                                                                | 0.80                                                          |
| Trunk fat (%)               | 8,218                     | 33.6 (7.6)                   | 34.0 (7.6)                             | 0.83                                                                | 0.84                                                          |
| <i>General adiposity</i>    |                           |                              |                                        |                                                                     |                                                               |
| BMI (kg/m <sup>2</sup> )    | 8,290                     | 26.4 (4.8)                   | 26.5 (4.9)                             | 0.94                                                                | 0.91                                                          |
| Height-adjusted weight (kg) | 8,290                     | 69.8 (12.6)                  | 69.7 (12.6)                            | 0.93                                                                | 0.92                                                          |
| Hip circumference (cm)      | 8,292                     | 102 (10)                     | 103 (10)                               | 0.89                                                                | 0.79                                                          |
| Body fat (%)                | 8,218                     | 36.0 (6.7)                   | 36.5 (6.7)                             | 0.87                                                                | 0.87                                                          |

BMI: body mass index, HbA1c: glycosylated haemoglobin. Exclusion criteria: participants with self-reported cancer, chronic obstructive pulmonary disease or liver failure/cirrhosis; with missing values of adiposity measures, blood pressure, HbA1c, or urinary albumin-to-creatinine ratio.

**Table S7a: Associations between incremental increase in central adiposity and a higher urinary albumin-to-creatinine ratio category**

| Exposures                       | Increment | Adiposity adjustment |          |                                       |          |                                  |          |                          |          |
|---------------------------------|-----------|----------------------|----------|---------------------------------------|----------|----------------------------------|----------|--------------------------|----------|
|                                 |           | BMI<br>OR (95% CI)   | $\chi^2$ | Height-adjusted weight<br>OR (95% CI) | $\chi^2$ | Hip circumference<br>OR (95% CI) | $\chi^2$ | Body fat%<br>OR (95% CI) | $\chi^2$ |
| <b>Waist-to-hip ratio</b>       |           |                      |          |                                       |          |                                  |          |                          |          |
| Confounder-adjusted model       | 0.06      | 1.55 (1.53, 1.57)    | 3,683    | 1.55 (1.53, 1.57)                     | 3,683    | 1.55 (1.53, 1.57)                | 3,683    | 1.55 (1.53, 1.57)        | 3,683    |
| Adiposity-adjusted model        |           | 1.32 (1.30, 1.34)    | 1,297    | 1.32 (1.30, 1.34)                     | 1,294    | 1.46 (1.44, 1.48)                | 2,618    | 1.39 (1.36, 1.41)        | 1,819    |
| Mediator-adjusted model         |           | 1.24 (1.22, 1.26)    | 770      | 1.24 (1.22, 1.26)                     | 753      | 1.32 (1.30, 1.34)                | 1,348    | 1.36 (1.34, 1.38)        | 1,738    |
| <b>Waist-to-height ratio</b>    |           |                      |          |                                       |          |                                  |          |                          |          |
| Confounder-adjusted model       | 0.07      | 1.50 (1.48, 1.52)    | 5,598    | 1.50 (1.48, 1.52)                     | 5,598    | 1.50 (1.48, 1.52)                | 5,598    | 1.50 (1.48, 1.52)        | 5,598    |
| Adiposity-adjusted model        |           | 1.32 (1.30, 1.34)    | 1,269    | 1.31 (1.29, 1.32)                     | 1,278    | 1.46 (1.44, 1.48)                | 3,323    | 1.44 (1.42, 1.46)        | 2,834    |
| Mediator-adjusted model         |           | 1.24 (1.22, 1.26)    | 741      | 1.22 (1.20, 1.24)                     | 688      | 1.31 (1.29, 1.32)                | 1,608    | 1.34 (1.32, 1.35)        | 2,655    |
| <b>Waist circumference (cm)</b> |           |                      |          |                                       |          |                                  |          |                          |          |
| Confounder-adjusted model       | 12.1      | 1.53 (1.51, 1.55)    | 5,560    | 1.53 (1.51, 1.55)                     | 5,560    | 1.53 (1.51, 1.55)                | 5,560    | 1.53 (1.51, 1.55)        | 5,560    |
| Adiposity-adjusted model        |           | 1.33 (1.31, 1.35)    | 1,257    | 1.32 (1.30, 1.34)                     | 1,138    | 1.54 (1.52, 1.57)                | 3,474    | 1.47 (1.45, 1.49)        | 2,848    |
| Mediator-adjusted model         |           | 1.26 (1.24, 1.28)    | 846      | 1.25 (1.23, 1.27)                     | 726      | 1.37 (1.35, 1.40)                | 1,793    | 1.36 (1.35, 1.38)        | 2,712    |
| <b>Trunk fat (%) †</b>          |           |                      |          |                                       |          |                                  |          |                          |          |
| Confounder-adjusted model       | 7.3       | 1.44 (1.42, 1.46)    | 2,878    | 1.44 (1.42, 1.46)                     | 2,878    | 1.44 (1.42, 1.46)                | 2,878    | 1.44 (1.42, 1.46)        | 2,878    |
| Adiposity-adjusted model        |           | 1.07 (1.05, 1.09)    | 67       | 1.06 (1.04, 1.07)                     | 42       | 1.25 (1.23, 1.27)                | 794      | -                        | -        |
| Mediator-adjusted model         |           | 1.05 (1.04, 1.07)    | 40       | 1.04 (1.02, 1.06)                     | 20       | 1.16 (1.14, 1.17)                | 322      | 1.27 (1.26, 1.29)        | 1,220    |

BMI: body mass index; uACR: urinary albumin-to-creatinine ratio; SBP: systolic blood pressure; DBP: diastolic blood pressure. Log ORs for a higher uACR category per incremental increase in adiposity are the inverse variance weighted averages of the sex-specific log ORs (calculated as the slopes of the inverse variance weighted regression through the log ORs of the top four adiposity categories). Confounder-adjusted model was adjusted for age, ethnicity, education, region, Townsend deprivation index, smoking, and physical activity at baseline. Adiposity-adjusted model was further adjusted for each of the adiposity measures (BMI, height-adjusted weight, hip circumference, and body fat [%]) at baseline. Mediator-model was further adjusted for diabetes status (diabetes, prediabetes, no diabetes), duration of diabetes, SBP, DBP, and self-reported vascular disease (heart attack, angina, or stroke). † Trunk fat (%) was not adjusted for body fat (%) due to high correlation between the two measures at baseline.



**Table S7b: Associations between incremental increase in general adiposity and a higher urinary albumin-to-creatinine ratio category**

| Exposures                          | Increment | Adiposity adjustment              |          |                                      |          |                                    |          |                           |          |
|------------------------------------|-----------|-----------------------------------|----------|--------------------------------------|----------|------------------------------------|----------|---------------------------|----------|
|                                    |           | Waist-to-hip ratio<br>OR (95% CI) | $\chi^2$ | Waist-to-height ratio<br>OR (95% CI) | $\chi^2$ | Waist circumference<br>OR (95% CI) | $\chi^2$ | Trunk fat%<br>OR (95% CI) | $\chi^2$ |
| <b>BMI (kg/m<sup>2</sup>)</b>      |           |                                   |          |                                      |          |                                    |          |                           |          |
| Confounder-adjusted model          | 5         | 1.47 (1.46, 1.49)                 | 5,171    | 1.47 (1.46, 1.49)                    | 5,171    | 1.47 (1.46, 1.49)                  | 5,171    | 1.47 (1.46, 1.49)         | 5,171    |
| Adiposity-adjusted model           |           | 1.35 (1.33, 1.37)                 | 2,731    | 1.18 (1.17, 1.20)                    | 478      | 1.20 (1.18, 1.21)                  | 555      | 1.42 (1.40, 1.44)         | 2,750    |
| Mediator-adjusted model            |           | 1.23 (1.22, 1.25)                 | 1,278    | 1.12 (1.10, 1.13)                    | 196      | 1.11 (1.09, 1.13)                  | 185      | 1.32 (1.30, 1.33)         | 2,390    |
| <b>Height-adjusted weight (kg)</b> |           |                                   |          |                                      |          |                                    |          |                           |          |
| Confounder-adjusted model          | 14        | 1.49 (1.48, 1.51)                 | 5,461    | 1.49 (1.48, 1.51)                    | 5,461    | 1.49 (1.48, 1.51)                  | 5,461    | 1.49 (1.48, 1.51)         | 5,461    |
| Adiposity-adjusted model           |           | 1.37 (1.35, 1.38)                 | 2,902    | 1.21 (1.19, 1.23)                    | 662      | 1.21 (1.19, 1.23)                  | 579      | 1.45 (1.43, 1.47)         | 2,956    |
| Mediator-adjusted model            |           | 1.25 (1.24, 1.27)                 | 1,424    | 1.15 (1.13, 1.17)                    | 330      | 1.13 (1.11, 1.14)                  | 228      | 1.33 (1.32, 1.35)         | 2,611    |
| <b>Hip circumference (cm)</b>      |           |                                   |          |                                      |          |                                    |          |                           |          |
| Confounder-adjusted model          | 9.2       | 1.34 (1.32, 1.35)                 | 2,745    | 1.34 (1.32, 1.35)                    | 2,745    | 1.34 (1.32, 1.35)                  | 2,745    | 1.34 (1.32, 1.35)         | 2,745    |
| Adiposity-adjusted model           |           | 1.26 (1.25, 1.27)                 | 1,660    | 1.06 (1.05, 1.08)                    | 85       | 1.00 (0.99, 1.01)                  | 0        | 1.22 (1.20, 1.23)         | 841      |
| Mediator-adjusted model            |           | 1.18 (1.17, 1.19)                 | 808      | 1.05 (1.04, 1.07)                    | 56       | 1.00 (0.98, 1.01)                  | 0        | 1.22 (1.21, 1.23)         | 1,202    |
| <b>Body fat (%) †</b>              |           |                                   |          |                                      |          |                                    |          |                           |          |
| Confounder-adjusted model          | 7.6       | 1.56 (1.53, 1.58)                 | 3,495    | 1.56 (1.53, 1.58)                    | 3,495    | 1.56 (1.53, 1.58)                  | 3,495    | 1.56 (1.53, 1.58)         | 3,495    |
| Adiposity-adjusted model           |           | 1.35 (1.33, 1.38)                 | 1,490    | 1.09 (1.07, 1.11)                    | 87       | 1.09 (1.07, 1.11)                  | 88       | -                         | -        |
| Mediator-adjusted model            |           | 1.22 (1.20, 1.24)                 | 619      | 1.05 (1.03, 1.07)                    | 23       | 1.03 (1.01, 1.05)                  | 12       | 1.34 (1.32, 1.37)         | 1,478    |

BMI: body mass index; uACR: urinary albumin-to-creatinine ratio; SBP: systolic blood pressure; DBP: diastolic blood pressure. Log ORs for a higher uACR category per incremental increase in adiposity are the inverse variance weighted averages of the sex-specific log ORs (calculated as the slopes of the inverse variance weighted regression through the log ORs of the top four adiposity categories). Confounder-adjusted model was adjusted for age, ethnicity, education, region, Townsend deprivation index, smoking, and physical activity at baseline. Adiposity-adjusted model was further adjusted for each of the adiposity measures (waist-to-hip ratio, waist-to-height ratio, waist circumference, and trunk fat [%]) at baseline. Mediator-model was further adjusted for diabetes status (diabetes, prediabetes, no diabetes), duration of diabetes, SBP, DBP, and self-reported vascular disease (heart attack, angina, or stroke). † Body fat (%) was not adjusted for trunk fat (%) due to high correlation between the two measures at baseline.

**Figure S1: Flow chart of participants' selection, with reasons for exclusion**

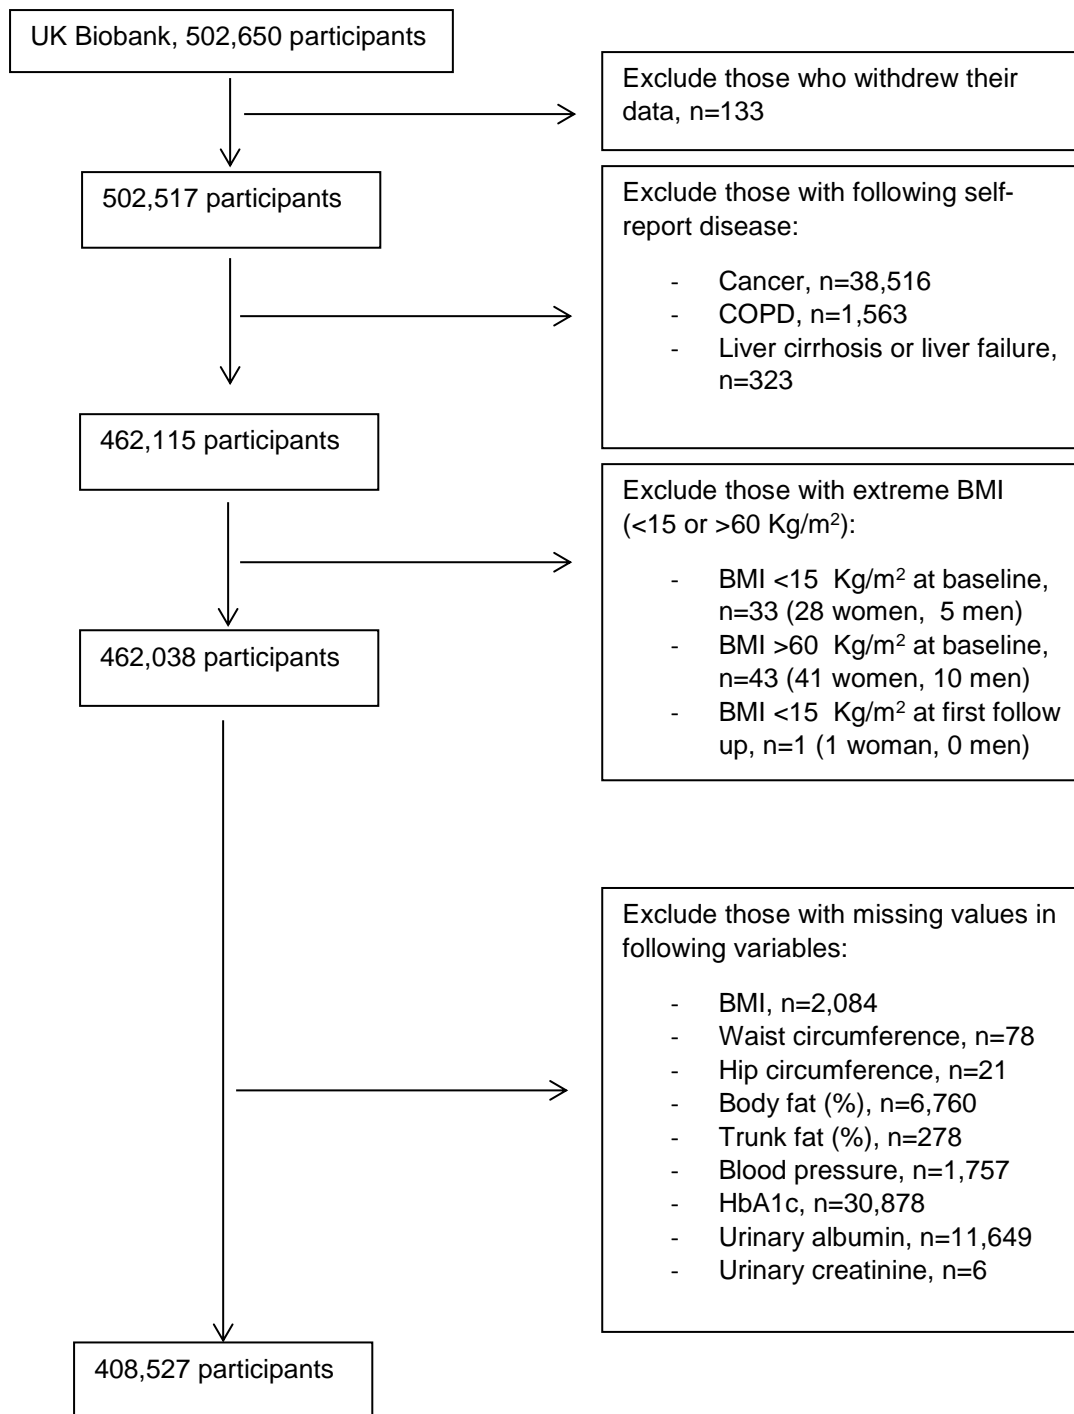

COPD: chronic obstructive pulmonary disease; BMI: body mass index; HbA1c: glycosylated haemoglobin.

**Figure S2: Directed acyclic graph showing assumed associations between baseline measured adiposity, characteristics, and albuminuria**

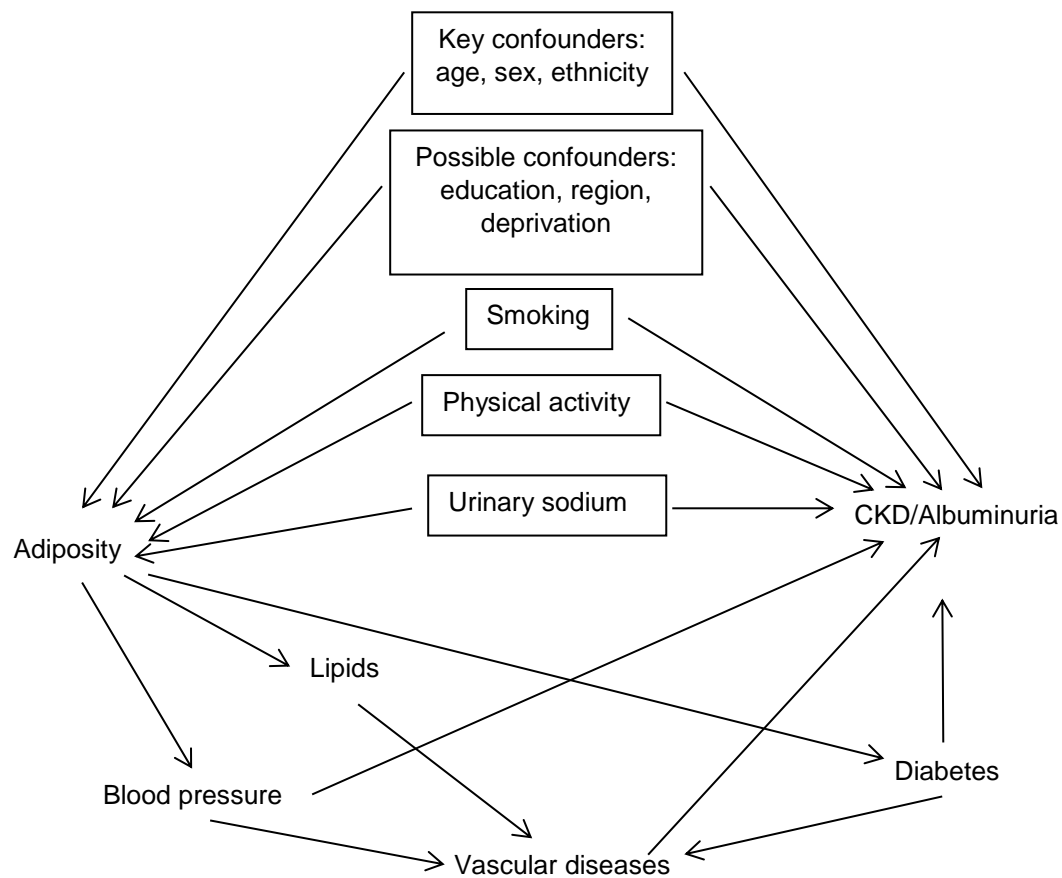

1. Exposures: measures of adiposity; outcome: albuminuria;
2. Key confounders (age, sex, and ethnicity) are chosen as they are correlated with the exposure and outcome but cannot be changed by exposure and outcome;
3. Possible confounders (region, education, and deprivation) are associated with the exposure and outcome and unlikely to be changed by exposure and outcome;
4. Smoking and physical activity are widely accepted to modify weight, whereas some uncertainties remained if these factors affect albuminuria risk;
5. Some studies also suggested the possible confounding effect of dietary sodium (measured by urinary sodium) in association between adiposity and kidney function;
6. Blood pressure, vascular diseases (heart attack, angina, or stroke), and possibly lipids are effect mediators which may be effected by adiposity and have an effect on albuminuria risk;
7. Arrows between confounders and effect mediators are omitted to simplify the causal diagram;
8. Alcohol is not included as there is no certain evidence of an association between alcohol and risk of albuminuria;
9. Though an indirect association between lipids and albuminuria is presented, trial evidence does not suggest low-density lipoprotein cholesterol or high-density lipoprotein cholesterol has an effect on albuminuria risk (i.e. no direct causal pathway between lipids and albuminuria is assumed);
10. Variables enclosed by boxes are considered confounders and will be adjusted for during analyses (all models);
11. Analyses adjusting for diabetes, systolic blood pressure, and vascular diseases are conducted to assess the mediation effect of these factors; no adjustment is made for lipids as conditioning on vascular diseases closes the pathway between lipids and albuminuria.

**Figure S3: Sex-specific associations between BMI and central adiposity measures**

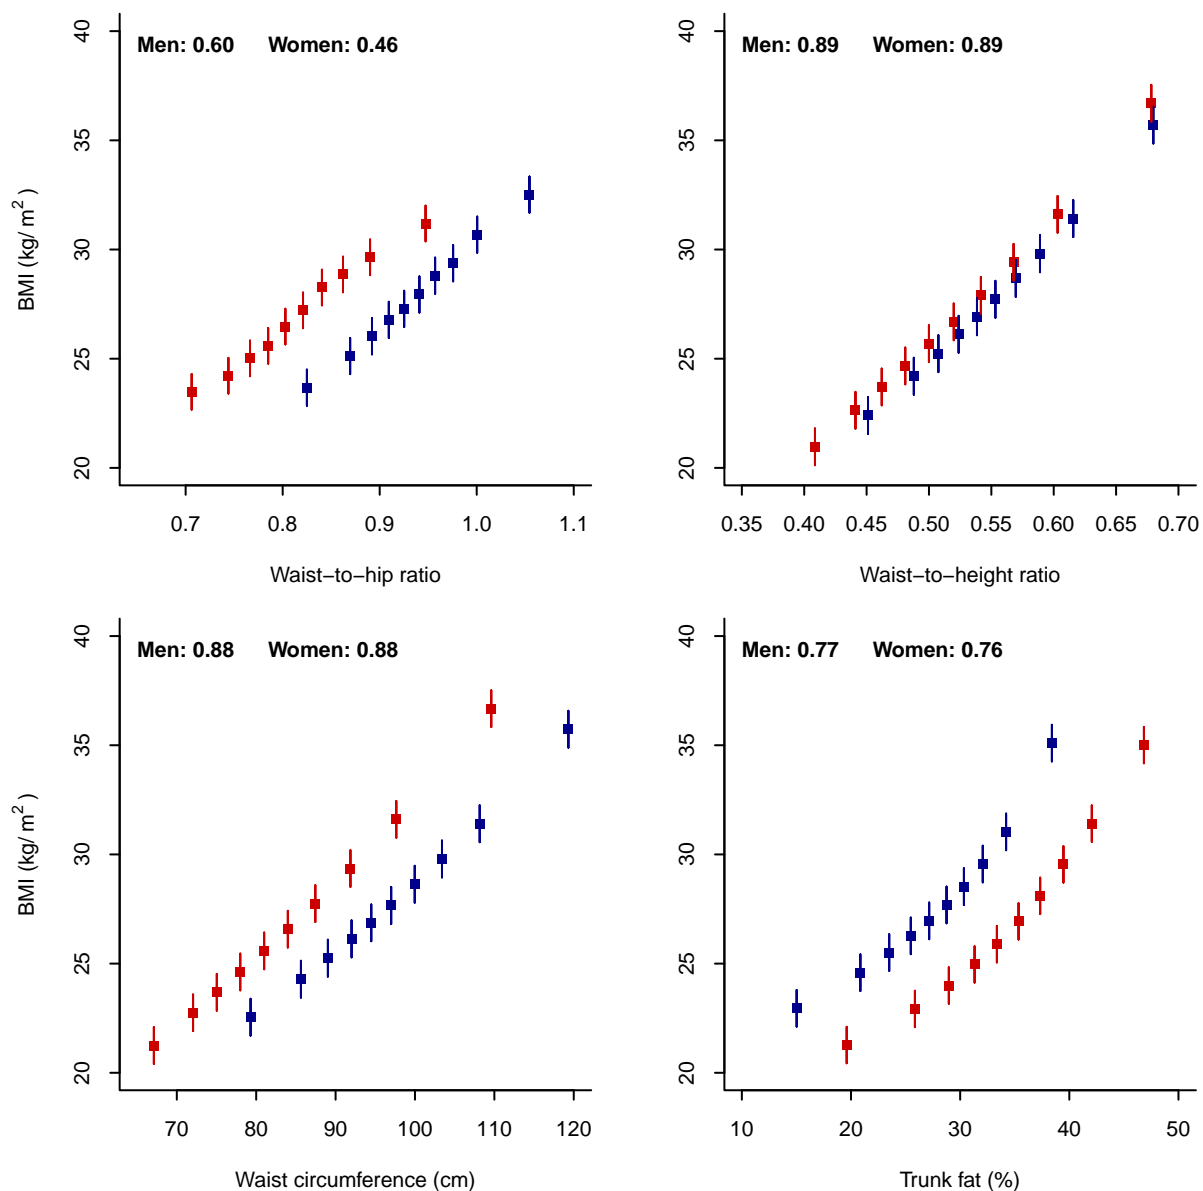

Red: women; blue: men.

BMI: body mass index, HbA1c: glycosylated haemoglobin.

Age-adjusted associations between adiposity measures in individuals without cancer, chronic obstructive pulmonary disease, or liver failure/cirrhosis, and without missing values in adiposity measures, blood pressure, HbA1c, or urinary creatinine are shown.

Age-adjusted Pearson correlation coefficients are shown on plots.

**Figure S4: Associations between incremental increase in adiposity (waist-to-hip ratio and BMI) and a higher urinary albumin-to-creatinine ratio category overall and by sex**

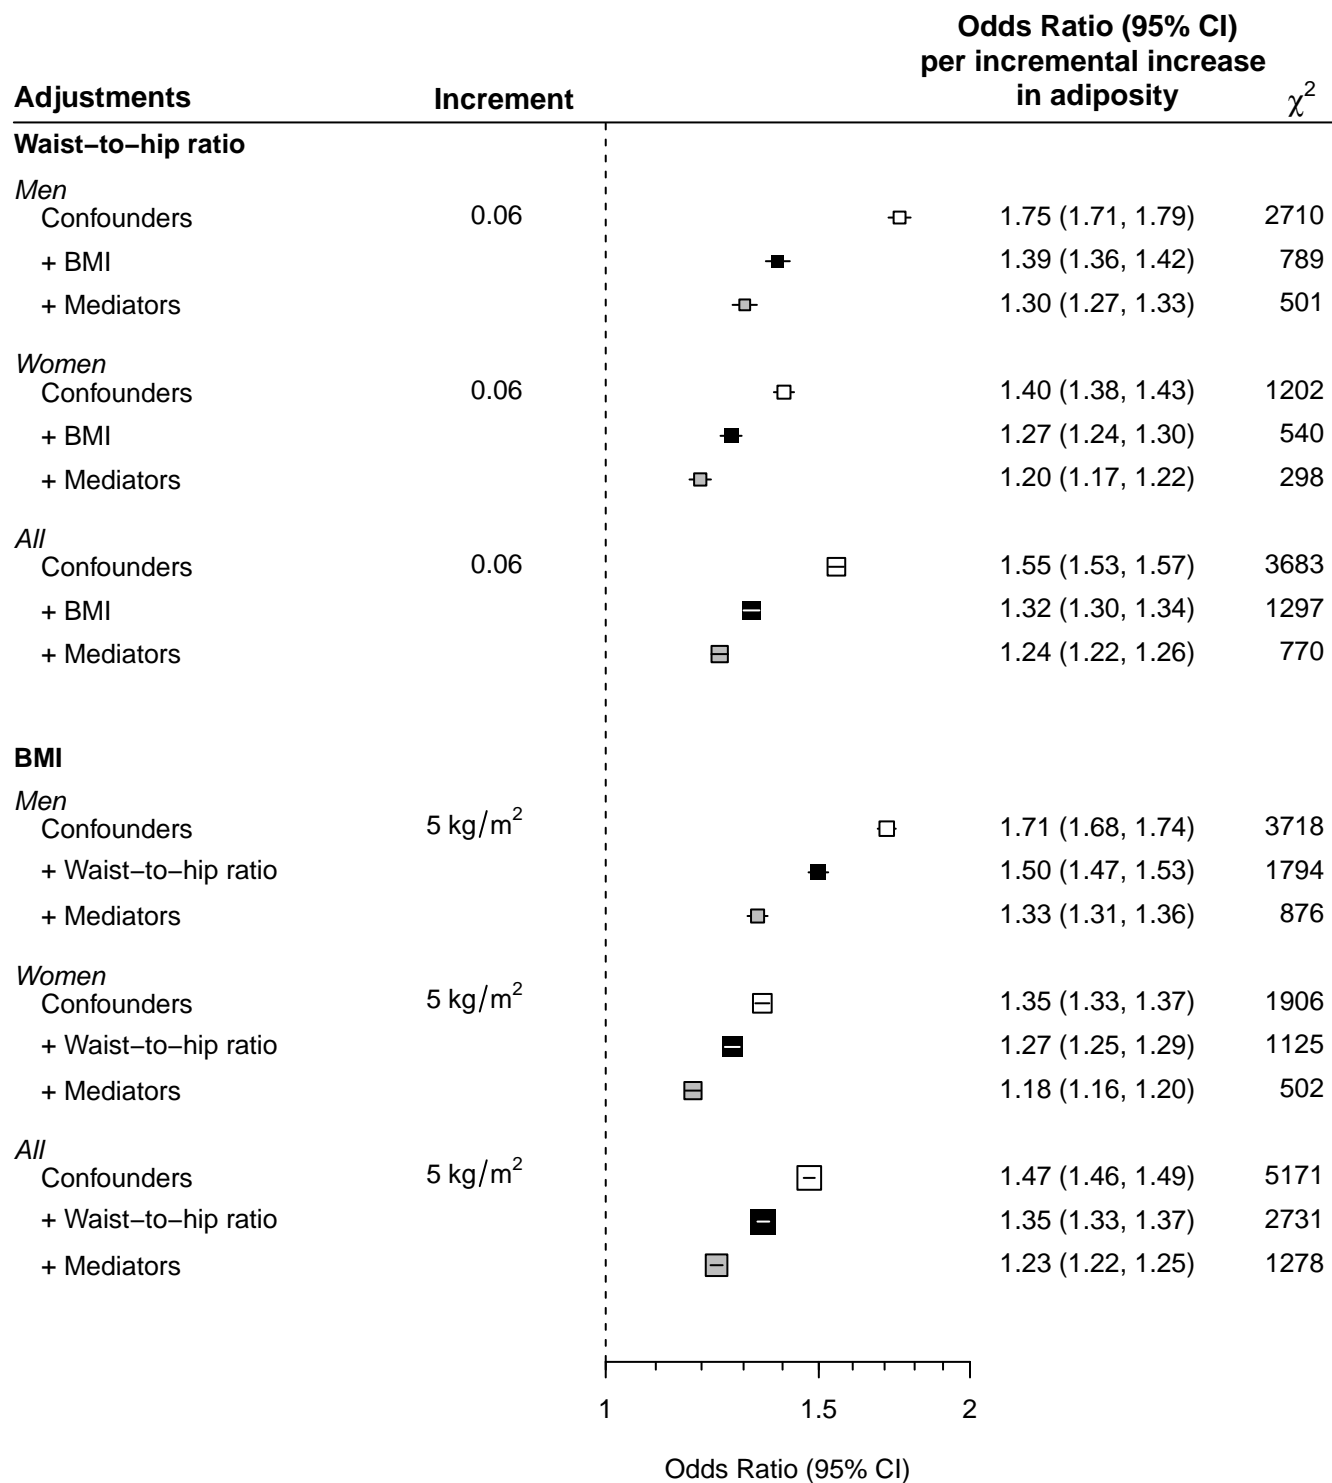

BMI: body mass index, uACR: urinary albumin-to-creatinine ratio,

SBP: systolic blood pressure, DBP: diastolic blood pressure, HbA1c: glycosylated haemoglobin.

Log ORs for a higher uACR category per incremental increase in adiposity overall are the inverse variance weighted averages of the sex-specific log ORs (calculated as the slopes of the inverse variance weighted regressions through the log ORs of the top four adiposity categories). Confounders: age, ethnicity, education, region, Townsend deprivation index, smoking, physical activity at baseline.

Mediators: diabetes status (diabetes, prediabetes, no diabetes), duration of diabetes, SBP, DBP, and any self-reported vascular disease [heart attack, angina, or stroke] at baseline.

**Figure S5: Associations between incremental increase in adiposity (waist-to-hip ratio and BMI) and albuminuria (urinary albumin-to-creatinine ratio of 3 mg/mmol or greater) overall**

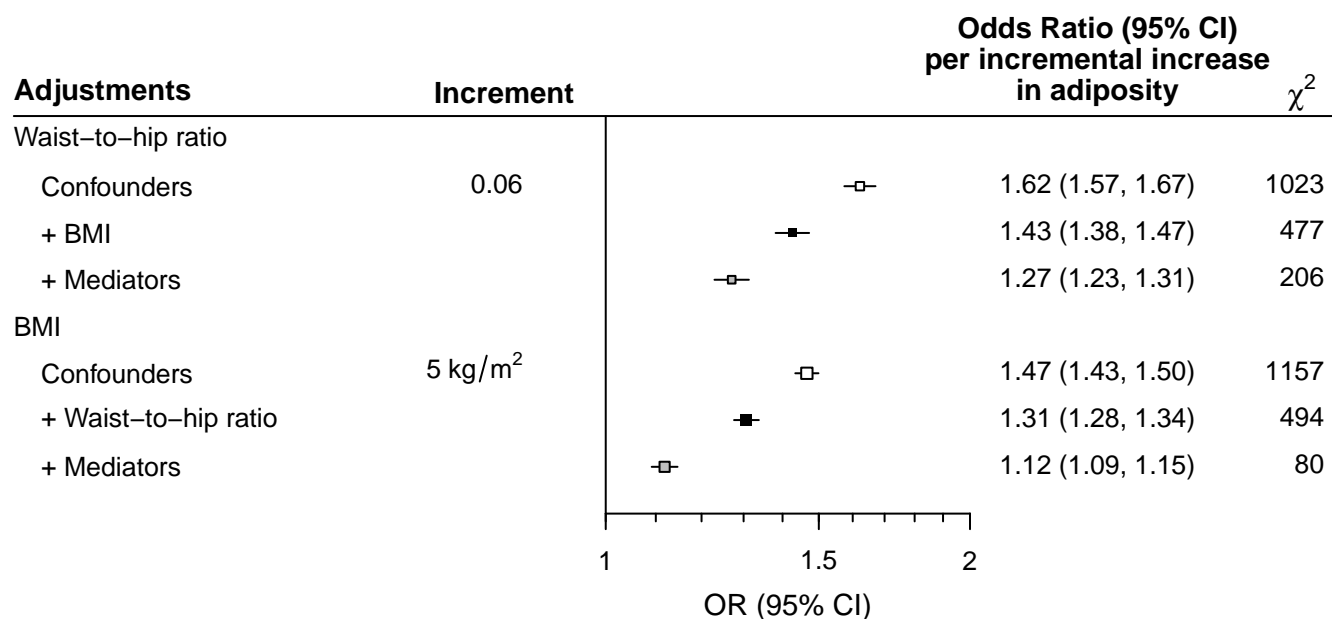

BMI: body mass index, SBP: systolic blood pressure, DBP: diastolic blood pressure, uACR: urinary albumin-to-creatinine ratio.

Log ORs for albuminuria (uACR of 3 mg/mmol or greater) per incremental increase in adiposity overall are the inverse variance weighted averages of the sex-specific log ORs (calculated as the slopes of the inverse variance weighted regressions through the log ORs of the top four adiposity categories).

Confounders: age, ethnicity, education, region, Townsend deprivation index, smoking, and physical activity at baseline.

Mediators: diabetes status (diabetes, prediabetes, no diabetes), duration of diabetes, SBP, DBP, and any self-reported vascular disease (heart attack, angina, or stroke) at baseline.

**Figure S6: Associations between incremental increase in adiposity (other 4 adiposity measures) and a higher urinary albumin-to-creatinine ratio category by sex**

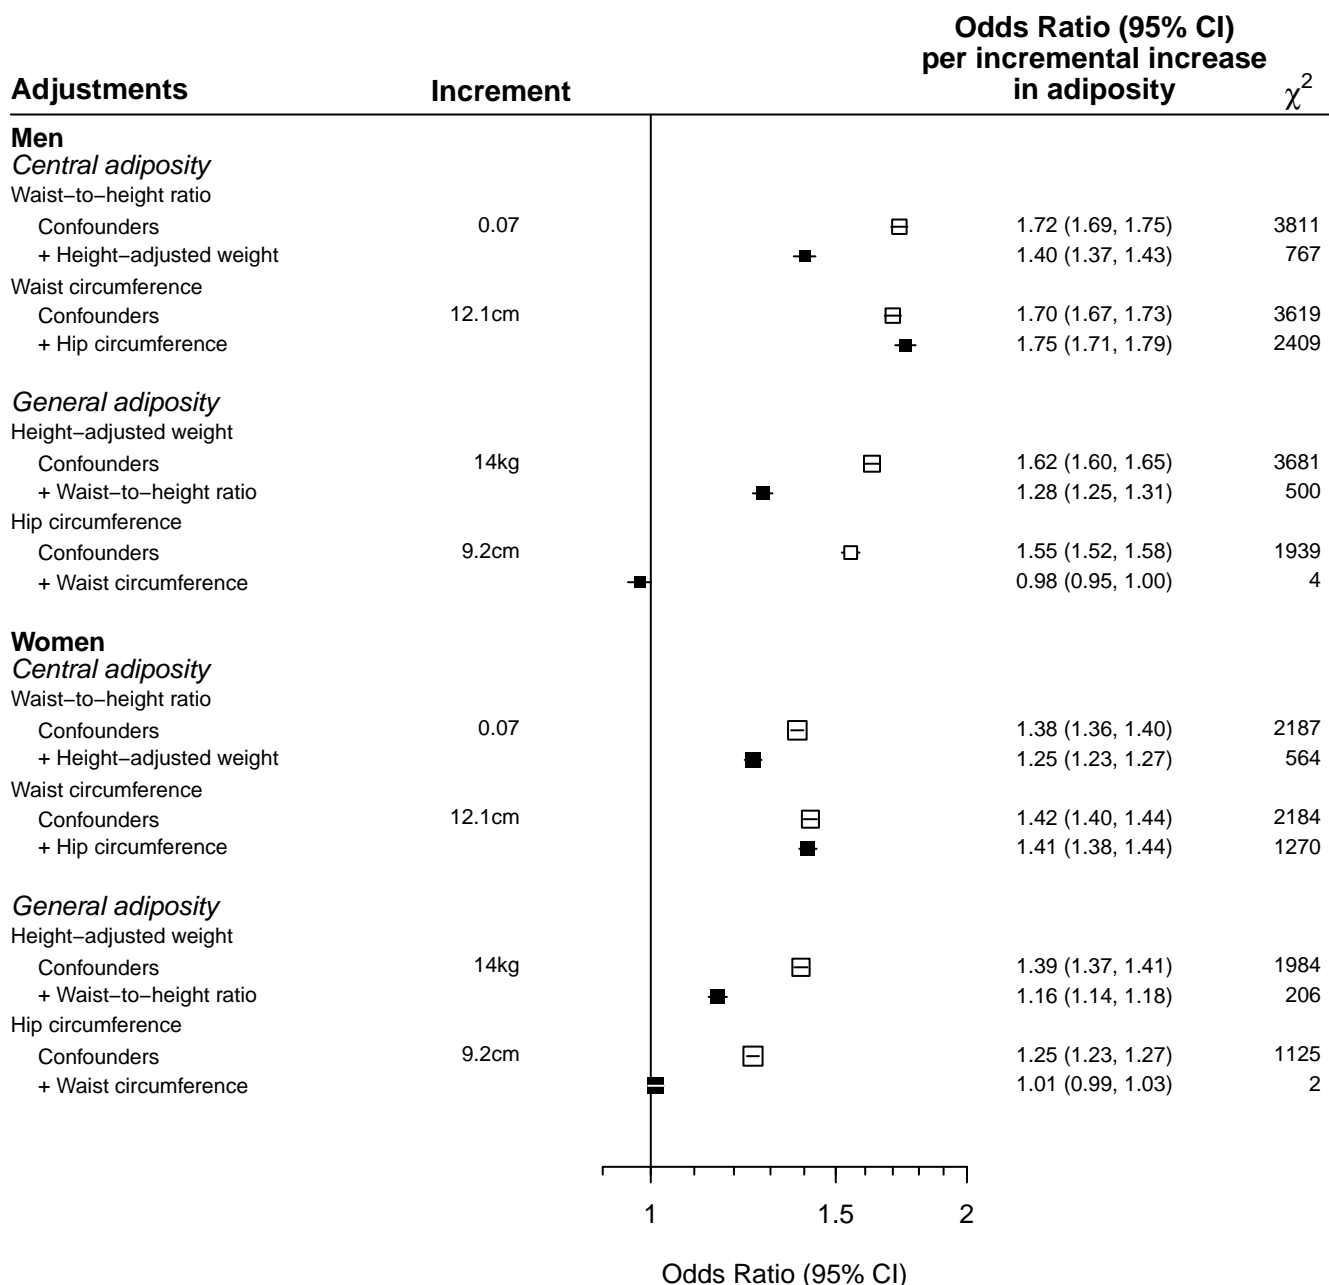

BMI: body mass index, uACR: urinary albumin-to-creatinine ratio, SBP: systolic blood pressure, DBP: diastolic blood pressure.

Log ORs for a higher uACR category per incremental increase in adiposity overall are the inverse variance weighted averages of the sex-specific log ORs (calculated as the slopes of the inverse variance weighted regressions through the log ORs of the top four adiposity categories).

Confounders: age, ethnicity, education, region, Townsend deprivation index, smoking, and physical activity at baseline.

**Figure S7: Associations between incremental increase in adiposity (waist-to-hip ratio and BMI) and a higher urinary albumin-to-creatinine ratio category without adjustments for measurement error overall and by sex**

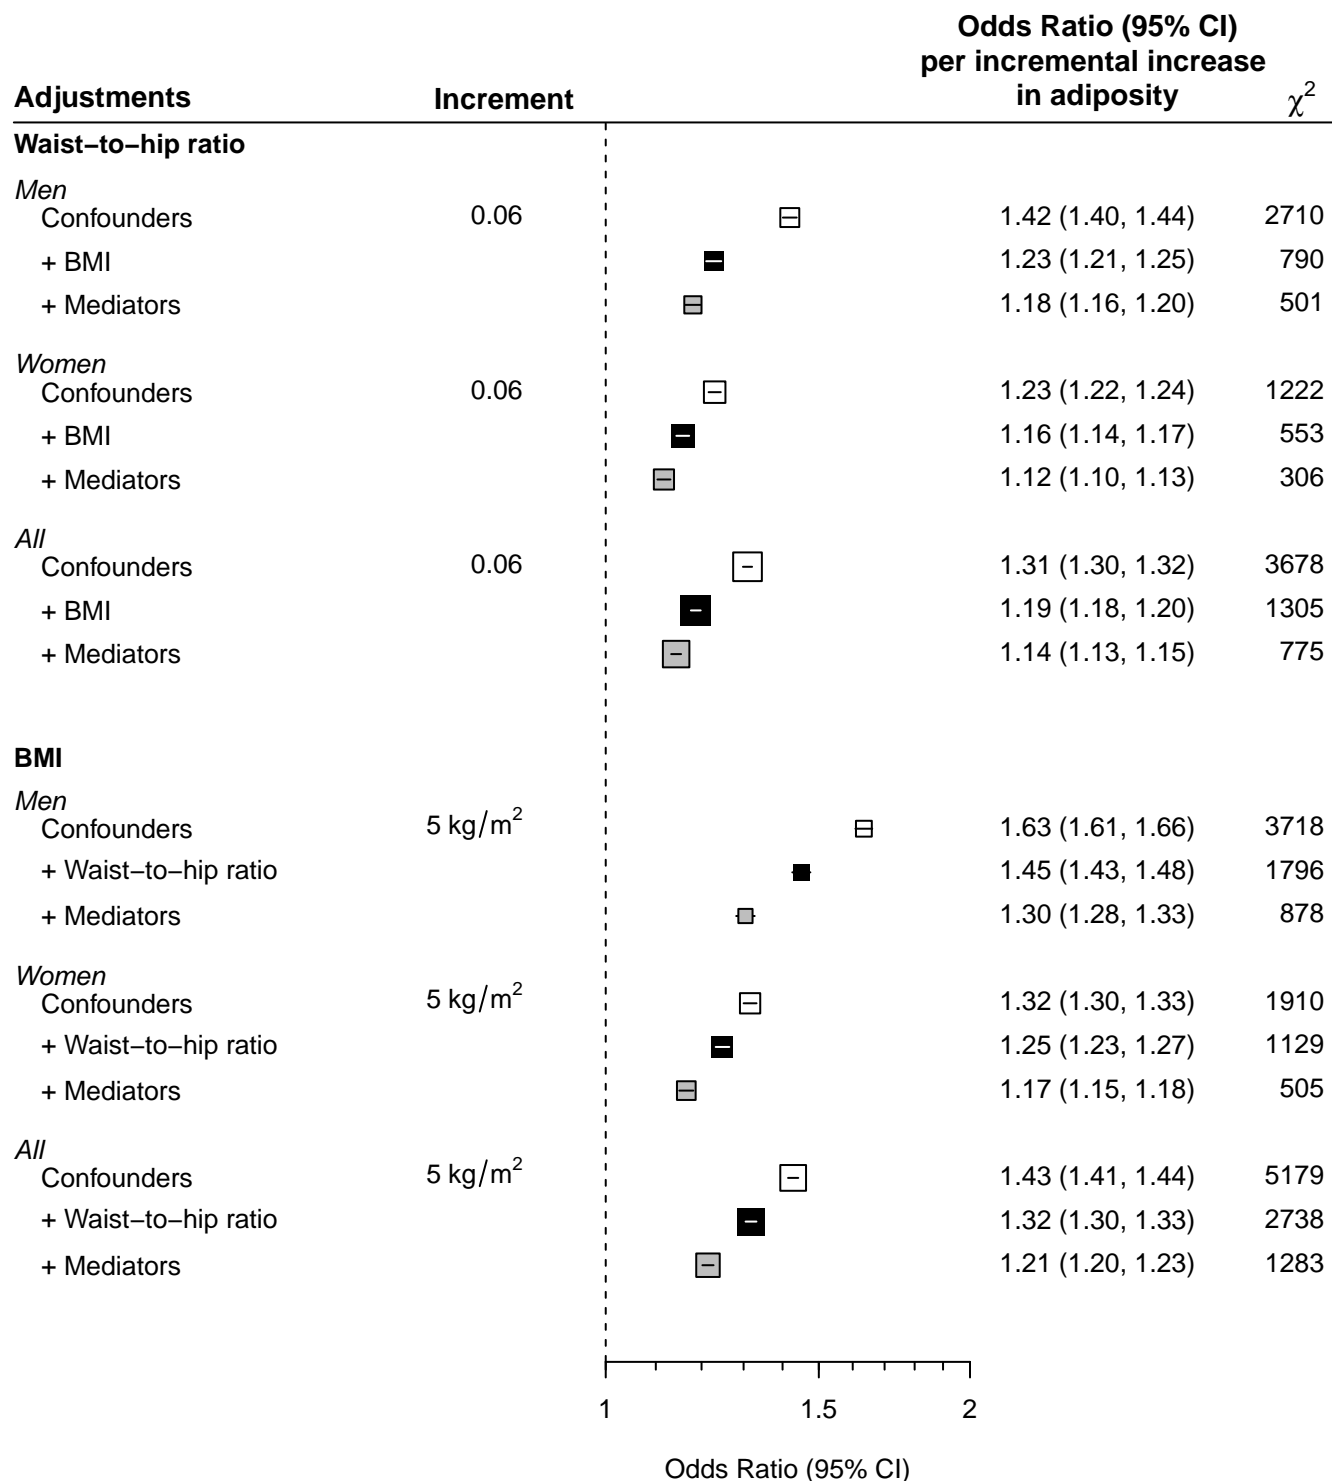

BMI: body mass index, uACR: urinary albumin-to-creatinine ratio,

SBP: systolic blood pressure, DBP: diastolic blood pressure, HbA1c: glycosylated haemoglobin.

Log ORs for a higher uACR category per incremental increase in adiposity overall are the inverse variance weighted averages of the sex-specific log ORs (calculated as the slopes of the inverse variance weighted regressions through the log ORs of the top four adiposity categories). Confounders: age, ethnicity, education, region, Townsend deprivation index, smoking, physical activity at baseline.

Mediators: diabetes status (diabetes, prediabetes, no diabetes), duration of diabetes, SBP, DBP, and any self-reported vascular disease [heart attack, angina, or stroke] at baseline.



**Figure S8: Associations between adiposity (waist-to-hip adjusted for BMI and BMI adjusted for waist-to-hip ratio) and albuminuria by sex and by halves of urinary sodium-to-creatinine ratio**

**Men**

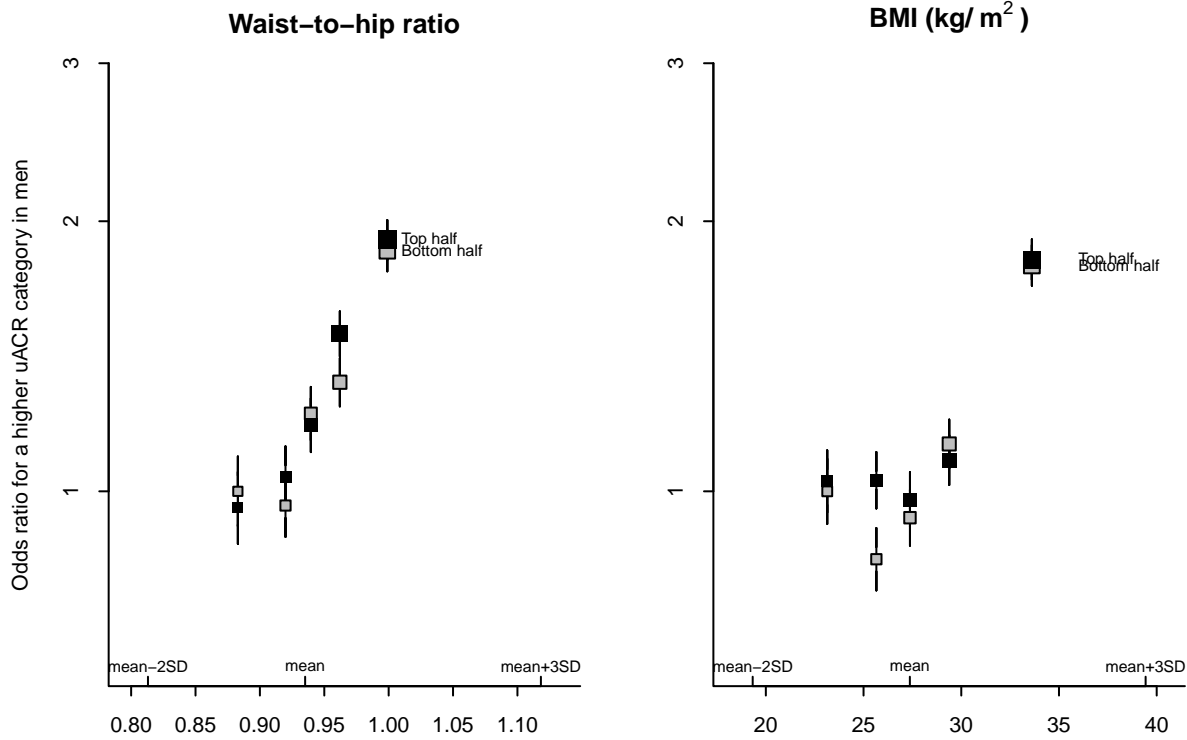

**Women**

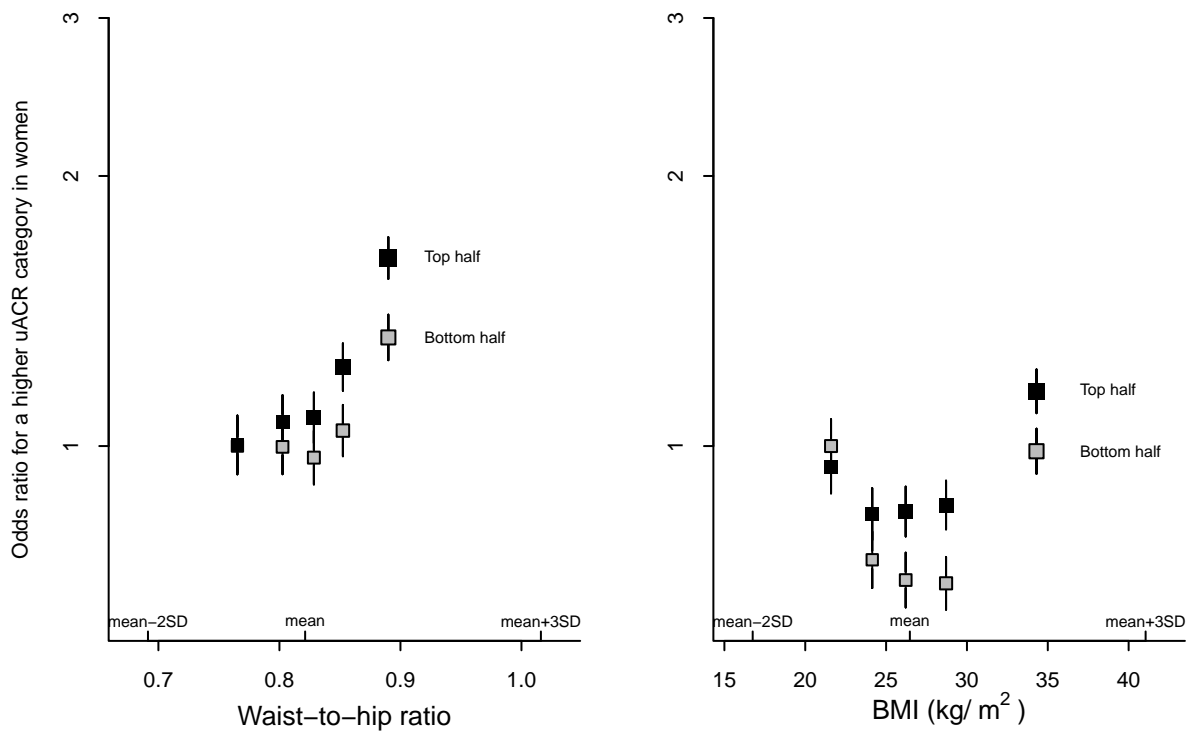

BMI: body mass index.

Model was adjusted for confounders (age, ethnicity, education, region, Townsend deprivation index, smoking, physical activity) and reciprocal adiposity (ie. waist-to-hip ratio adjusted for BMI, BMI adjusted for waist-to-hip ratio) at baseline.

The confounding effect of urinary sodium-to-creatinine ratio was small and was not included in analyses.

ORs (95% CI) per 5 Kg/ m<sup>2</sup> increase in BMI before and after adjustment of urinary sodium-to-creatinine ratio were 1.47 (1.43 – 1.50) and 1.46 (1.43 – 1.50).

ORs (95% CI) per 0.06 increase in waist-to-hip ratio before and after adjustment of urinary sodium-to-creatinine ratio were 1.62 (1.58 – 1.67) and 1.62 (1.57 – 1.67).
